# Supplementary material for: Models of the iron-only hydrogenase enzyme: structure, electrochemistry and catalytic activity of Fe2(CO)3(μ-dithiolate)(μ,κ1,κ2-triphos)
Source: Royal Society of Chemistry journal article supplement (doi:10.1039/c9dt00700h), 2019-01-01

## Electronic Supplementary Information (ESI)

### Models of the iron-only hydrogenase enzyme: Structure, electrochemistry and catalytic activity of $\text{Fe}_2(\text{CO})_3(\mu\text{-dithiolate})(\mu,\kappa^1,\kappa^2\text{-triphos})$

**David Unwin, Shishir Ghosh, Faith Ridley, Michael G. Richmond, Katherine Holt\* and Graeme Hogarth\***

<sup>a</sup> Department of Chemistry, University College London, 20 Gordon Street, London, WC1H 0AJ, U.K

<sup>b</sup> Department of Chemistry, King's College London, Britannia House, 7 Trinity Street, London, SE1 1DB, U.K

<sup>c</sup> Department of Chemistry, University of North Texas, 1155 Union Circle, Box 305070, Denton, TX 76203, USA

- (i) CVs of oxidation of **1** over a range of scan rates
- (ii) CVs of oxidation of **3** over a range of scan rates
- (iii) Electrocatalytic performance of **4** on addition of strong acid
- (iv) Oxidation response for **3** on addition of strong acid
- (v) Computational Details
- (vi) Crystallographic data and structure refinement for **1**
- (vii) Crystallographic data and structure refinement for **3**

**(i) CVs of oxidation of 1 over a range of scan rates**

**1** undergoes oxidation at  $E_{1/2} = -0.35$  V in a process that was found to be reversible ( $i_p^{ox}/i_p^{red}$  ca. 1) over all scan rates studied ( $0.01 - 10$  V s<sup>-1</sup>).

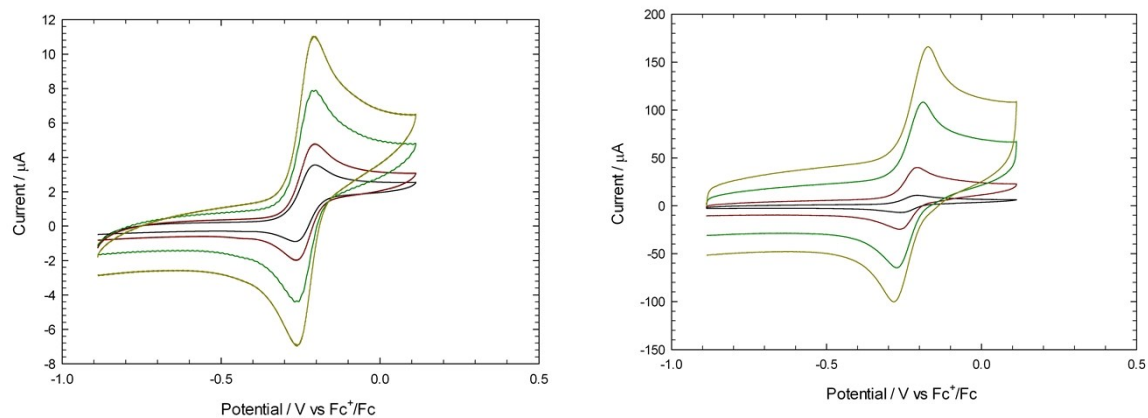

*Fig ESI 1: CV of 0.5 mM complex 1 in 0.1 M TBAPF<sub>6</sub>/ CH<sub>2</sub>Cl<sub>2</sub> over range of scan rate. Left: 0.01 V s<sup>-1</sup> (black); 0.02 V s<sup>-1</sup> (brown); 0.05 V s<sup>-1</sup> (dark green); 0.1 V s<sup>-1</sup> (light green). Right: 0.1 V s<sup>-1</sup> (black); 1 V s<sup>-1</sup> (brown); 5 V s<sup>-1</sup> (dark green); 10 V s<sup>-1</sup> (light green).*

## (ii) CVs of oxidation of **3** over a range of scan rates

Oxidation of **3** takes place reversibly at the same potential as for **1** ( $E_{1/2} = -0.35$  V), however a second oxidation couple of similar peak height is observed at  $E_{1/2} = -0.11$  V, suggestive of a further reversible one electron oxidation. The scan rate dependence of the two couples shows the relative peak heights and separations of the two processes do not change significantly with scan rate. The behaviour observed may be attributed to consecutive loss of two electrons from the same orbital; thus the first couple is assigned to the  $[\text{FeFe}]^{0/+}$  process and the second to  $[\text{FeFe}]^{+/2+}$ .

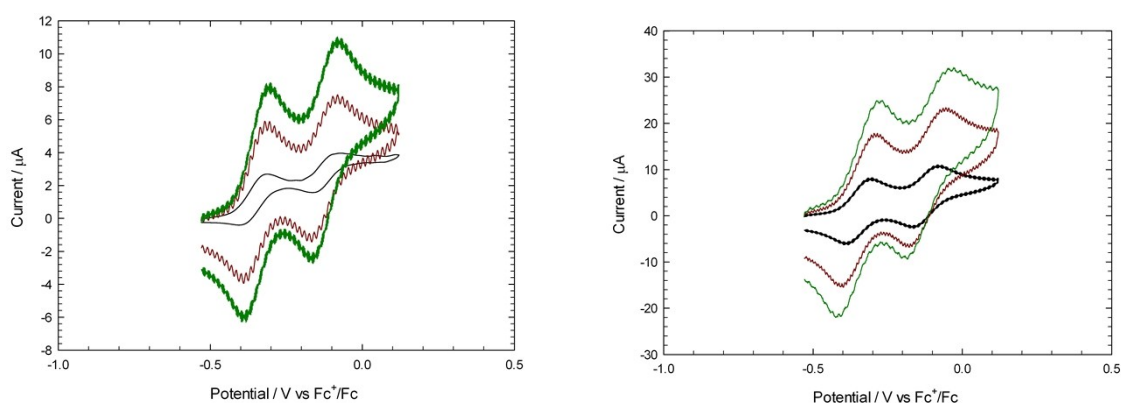

Fig ESI 2: CV of 0.5 mM complex **3** in 0.1 M TBAPF<sub>6</sub>/CH<sub>2</sub>Cl<sub>2</sub> over range of scan rate. Left: 0.01 V s<sup>-1</sup> (black); 0.02 V s<sup>-1</sup> (brown); 0.05 V s<sup>-1</sup> (dark green); 0.1 V s<sup>-1</sup> (light green). Right: 0.1 V s<sup>-1</sup> (black); 1 V s<sup>-1</sup> (brown); 5 V s<sup>-1</sup> (dark green); 10 V s<sup>-1</sup> (light green).

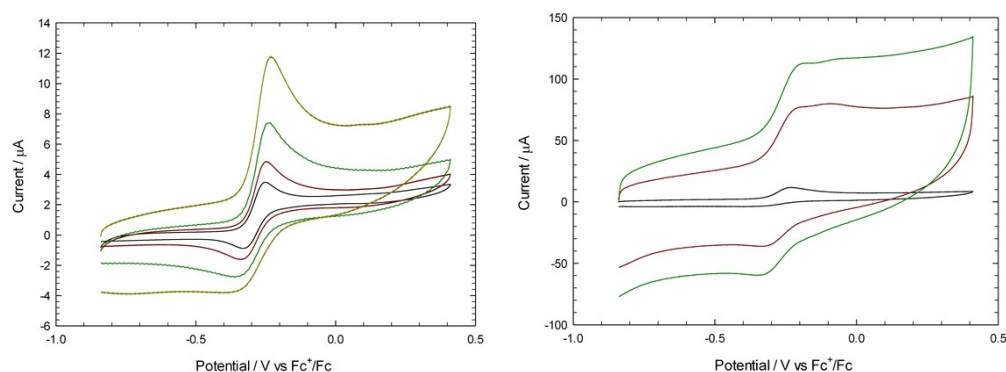

Fig ESI 3: CV of 0.5 mM complex **3** in 0.1 M TBAPF<sub>6</sub>/CH<sub>3</sub>CN over range of scan rate. Left: 0.01 V s<sup>-1</sup> (black); 0.02 V s<sup>-1</sup> (brown); 0.05 V s<sup>-1</sup> (dark green); 0.1 V s<sup>-1</sup> (light green). Right: 0.1 V s<sup>-1</sup> (black); 1 V s<sup>-1</sup> (brown); 5 V s<sup>-1</sup> (dark green); 10 V s<sup>-1</sup> (light green).

We find that in CH<sub>3</sub>CN, **3** instead undergoes a single, irreversible two-electron oxidation at slow scans, which resolves into two consecutive one electron processes as scan rate is increased. This is consistent with further stabilisation of the **3**<sup>2+</sup> species via formation of an adduct  $[\mathbf{3}(\text{CH}_3\text{CN})]^{2+}$  with the coordinating solvent, as isolated

and characterised for similar compounds by Olsen *et al.* (M.T. Olsen, T.B. Rauchfuss, S.R. Wilson, J. Am. Chem. Soc. 132 (2010) 17733-17740.)

### (iii) Electrocatalytic performance of **4** on addition of strong acid

The performance of open-bridged **4** was investigated in the presence of  $\text{HBF}_4 \cdot \text{Et}_2\text{O}$  in electrolytes composed of  $\text{TBAPF}_6$ ,  $\text{TBABF}_4$  and  $\text{TBAClO}_4$ . Broadly the same features can be identified as for **1** and hence the reaction mechanism shown in Fig 4 is proposed to also apply for **4**. However it was found that the identity of supporting anion influenced the relative currents observed at potentials **A**, **B** and **C** in a different manner than for **1**.

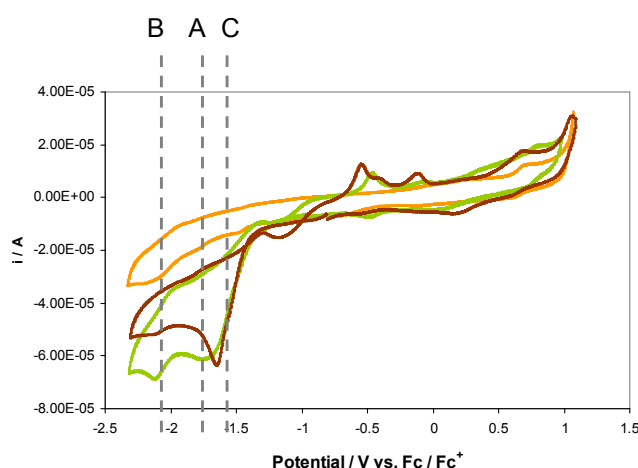

Fig EC4: CV of 0.5 mM complex **4** with 10 molar equivalent of  $\text{HBF}_4 \cdot \text{Et}_2\text{O}$  (scan rate  $0.1 \text{ V s}^{-1}$ ) in 0.1 M  $\text{TBAPF}_6 / \text{CH}_2\text{Cl}_2$  (orange); 0.1 M  $\text{TBABF}_4 / \text{CH}_2\text{Cl}_2$  (green) in 0.1 M  $\text{TBAClO}_4 / \text{CH}_2\text{Cl}_2$  (brown). A, B and C refer to catalytic processes shown in Figure 4 in the main manuscript.

In  $\text{TBAPF}_6$  the currents were all very inhibited compared to those for **1**, reaching a maximum after only 4 equivalents of acid were introduced. This indicates that for **4**,  $\text{PF}_6^-$  plays a retarding role in intramolecular proton transfer leading to  $\text{H}_2$  elimination. This may be related to the open and flexible nature of the unlinked bridging groups, which may allow closer approach of the anion to the iron centres, where it could occupy a position that blocks the transfer. In the presence of  $\text{BF}_4^-$  or  $\text{ClO}_4^-$ , currents at potential C attributed to reduction of  $4(\mu\text{H})\text{H}^+$  are enhanced in comparison to those observed for  $1(\mu\text{H})\text{H}^+$  (Fig 4). This indicates that for **4** these anions facilitate more efficient production of the intermediate  $4\text{H}$  complex after  $\text{H}_2$  elimination from  $4\text{H}(\mu\text{H})\text{H}$ , suggesting  $\text{ClO}_4^-$  and  $\text{BF}_4^-$  may promote the intramolecular proton transfer steps necessary to form  $4(\mu\text{H})\text{-H}_2$ . That this process is accelerated more for **4** than **1**, suggests that optimal positioning of the anions with respect to the pdt or  $(\text{SMe})_2$  bridging groups is important.

**(iv) Oxidation response for 3 on addition of strong acid**

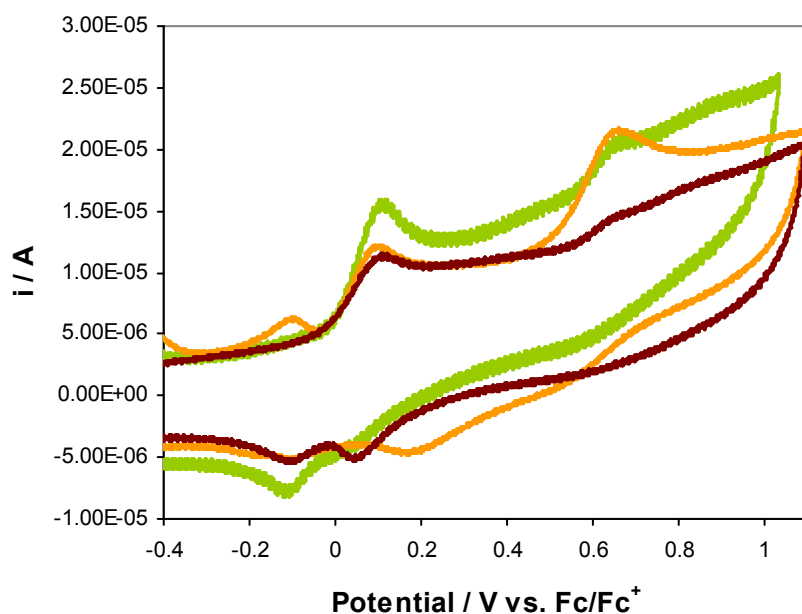

*Fig EC5: CV of oxidation response of 0.5 mM complex 3 with 10 molar equivalent of  $\text{HBF}_4\text{-Et}_2\text{O}$  (scan rate  $0.1 \text{ V s}^{-1}$ ) in 0.1 M  $\text{TBAPF}_6 / \text{CH}_2\text{Cl}_2$  (brown); 0.1 M  $\text{TBABF}_4 / \text{CH}_2\text{Cl}_2$  (green) in 0.1 M  $\text{TBAClO}_4 / \text{CH}_2\text{Cl}_2$  (orange).*

In excess acid the oxidation peak for protonated **3** is still observed at 0.15 V, the same potential as noted for  $3\text{H}_\text{N}^+$  in the presence of  $\text{TBAPF}_6$  and  $\text{TBABF}_4$ . There is only a very small increase in current at 0.75 V, where  $3\text{H}_\text{Fe}^+$  would be expected to undergo oxidation, indicating that this species is not present in solution at high concentration even in excess acid. In  $\text{TBAClO}_4$  peaks are observed at +0.15 V and at +0.75 V suggesting a mixture of species protonated at nitrogen and iron are present in solution.

## (v) Computational Details

B3LYP geometries and energies for all optimized structures

### Species A

HF energy= -3841.81363212

No Imaginary frequency

Zero-point correction = 0.692797 (Hartree/Particle)

Thermal correction to Energy = 0.742326

Thermal correction to Enthalpy = 0.743270

Thermal correction to Gibbs Free Energy = 0.607836

Sum of electronic and zero-point Energies = -3841.120835

Sum of electronic and thermal Energies = -3841.071306

Sum of electronic and thermal Enthalpies = -3841.070362

Sum of electronic and thermal Free Energies = -3841.205796

### Coordinates: A

|    |             |            |            |
|----|-------------|------------|------------|
| Fe | -0.03090000 | 6.09640000 | 7.02150000 |
| Fe | -0.61120000 | 7.55000000 | 5.03320000 |
| P  | -0.47060000 | 5.00660000 | 8.94120000 |
| P  | 0.39550000  | 4.12660000 | 6.03790000 |
| P  | -0.61130000 | 6.29820000 | 3.12620000 |
| S  | -2.12160000 | 6.05060000 | 5.99580000 |
| S  | -0.41340000 | 8.37390000 | 7.21810000 |
| O  | 2.76240000  | 6.67270000 | 7.66860000 |
| O  | 2.22510000  | 8.17770000 | 4.66390000 |
| O  | -1.83000000 | 9.93080000 | 3.83990000 |
| C  | 1.66370000  | 6.42570000 | 7.39900000 |
| C  | 1.10550000  | 7.91650000 | 4.82160000 |
| C  | -1.39850000 | 8.95640000 | 4.29510000 |
| C  | -3.46870000 | 6.91730000 | 6.92720000 |
| H  | -4.38570000 | 6.72460000 | 6.35570000 |
| H  | -3.57440000 | 6.41220000 | 7.89250000 |
| C  | -3.29090000 | 8.42000000 | 7.12330000 |
| H  | -3.25830000 | 8.92140000 | 6.14860000 |
| H  | -4.18440000 | 8.80340000 | 7.64370000 |
| C  | -2.06240000 | 8.81000000 | 7.94050000 |
| H  | -2.10710000 | 8.35190000 | 8.93690000 |
| H  | -2.04110000 | 9.89810000 | 8.07850000 |
| C  | -0.09480000 | 3.18580000 | 8.62080000 |
| H  | 0.97090000  | 3.05020000 | 8.84830000 |
| H  | -0.66160000 | 2.53460000 | 9.29760000 |
| C  | -0.36320000 | 2.82570000 | 7.14800000 |
| H  | -1.43770000 | 2.86960000 | 6.92740000 |
| H  | -0.03490000 | 1.80350000 | 6.92360000 |
| C  | -0.37150000 | 3.70050000 | 4.38370000 |
| H  | -0.12730000 | 2.64970000 | 4.17460000 |
| H  | -1.45970000 | 3.77130000 | 4.49650000 |
| C  | 0.12450000  | 4.57200000 | 3.21570000 |
| H  | -0.08500000 | 4.06240000 | 2.26730000 |

|   |             |            |             |
|---|-------------|------------|-------------|
| H | 1.21350000  | 4.67750000 | 3.27210000  |
| C | 0.53380000  | 5.38410000 | 10.44680000 |
| C | 1.06000000  | 6.67530000 | 10.61050000 |
| H | 0.89600000  | 7.42390000 | 9.83870000  |
| C | 1.79610000  | 7.00170000 | 11.75370000 |
| H | 2.19930000  | 8.00630000 | 11.86450000 |
| C | 2.02180000  | 6.04050000 | 12.74060000 |
| H | 2.60180000  | 6.29220000 | 13.62640000 |
| C | 1.50100000  | 4.75150000 | 12.58780000 |
| H | 1.67150000  | 3.99880000 | 13.35530000 |
| C | 0.75640000  | 4.42750000 | 11.45270000 |
| H | 0.34230000  | 3.42600000 | 11.35660000 |
| C | -2.17340000 | 4.94540000 | 9.68060000  |
| C | -3.13270000 | 4.01610000 | 9.24400000  |
| H | -2.88190000 | 3.28480000 | 8.48020000  |
| C | -4.42630000 | 4.01930000 | 9.77210000  |
| H | -5.15140000 | 3.28720000 | 9.42160000  |
| C | -4.78800000 | 4.95660000 | 10.74260000 |
| H | -5.79580000 | 4.95990000 | 11.15270000 |
| C | -3.84470000 | 5.88820000 | 11.18380000 |
| H | -4.11270000 | 6.62000000 | 11.94350000 |
| C | -2.55020000 | 5.88190000 | 10.65920000 |
| H | -1.82360000 | 6.60320000 | 11.02600000 |
| C | 2.14170000  | 3.56950000 | 5.75890000  |
| C | 3.07750000  | 4.50010000 | 5.27050000  |
| H | 2.78410000  | 5.53440000 | 5.11710000  |
| C | 4.39250000  | 4.11720000 | 4.99430000  |
| H | 5.09800000  | 4.85660000 | 4.62120000  |
| C | 4.80110000  | 2.79960000 | 5.21110000  |
| H | 5.82770000  | 2.50300000 | 5.00550000  |
| C | 3.88470000  | 1.86530000 | 5.69900000  |
| H | 4.19330000  | 0.83640000 | 5.87430000  |
| C | 2.56700000  | 2.24570000 | 5.96510000  |
| H | 1.87540000  | 1.49420000 | 6.33690000  |
| C | 0.36210000  | 7.04550000 | 1.73600000  |
| C | -0.26940000 | 7.93460000 | 0.84810000  |
| H | -1.33770000 | 8.11770000 | 0.93180000  |
| C | 0.45760000  | 8.58530000 | -0.15020000 |
| H | -0.05220000 | 9.26930000 | -0.82580000 |
| C | 1.83040000  | 8.36030000 | -0.28110000 |
| H | 2.39720000  | 8.86580000 | -1.06030000 |
| C | 2.47070000  | 7.48600000 | 0.59880000  |
| H | 3.54080000  | 7.30780000 | 0.51190000  |
| C | 1.74520000  | 6.83890000 | 1.60230000  |
| H | 2.27690000  | 6.18210000 | 2.28520000  |
| C | -2.23380000 | 5.95820000 | 2.28500000  |
| C | -3.42870000 | 6.49340000 | 2.78650000  |
| H | -3.40370000 | 7.08940000 | 3.69230000  |
| C | -4.64460000 | 6.26090000 | 2.13570000  |
| H | -5.56070000 | 6.68650000 | 2.54060000  |



|   |             |            |             |
|---|-------------|------------|-------------|
| C | -4.68340000 | 5.48790000 | 0.97470000  |
| H | -5.62960000 | 5.30540000 | 0.46880000  |
| C | -3.49780000 | 4.95490000 | 0.45850000  |
| H | -3.51600000 | 4.35980000 | -0.45250000 |
| C | -2.28490000 | 5.19190000 | 1.10590000  |
| H | -1.37060000 | 4.79370000 | 0.67080000  |

---

### Species TSAB

HF energy= -3841.79698330

One imaginary frequency (249i)

Zero-point correction = 0.692466 (Hartree/Particle)

Thermal correction to Energy = 0.741659

Thermal correction to Enthalpy = 0.742603

Thermal correction to Gibbs Free Energy = 0.606570

Sum of electronic and zero-point Energies = -3841.104518

Sum of electronic and thermal Energies = -3841.055324

Sum of electronic and thermal Enthalpies = -3841.054380

Sum of electronic and thermal Free Energies = -3841.190413

### Coordinates: TSAB

|    |             |            |            |
|----|-------------|------------|------------|
| Fe | 0.01220000  | 6.00850000 | 7.04890000 |
| Fe | -0.58550000 | 7.48930000 | 5.05760000 |
| P  | -0.42530000 | 4.91230000 | 8.95240000 |
| P  | 0.42970000  | 4.05160000 | 6.04370000 |
| P  | -0.59630000 | 6.24100000 | 3.14650000 |
| S  | -2.05270000 | 5.99680000 | 6.02630000 |
| S  | -0.35820000 | 8.26910000 | 7.22000000 |
| O  | 2.81400000  | 6.59120000 | 7.65460000 |
| O  | 2.22400000  | 8.21390000 | 4.62520000 |
| O  | -1.99290000 | 9.83340000 | 4.01080000 |
| C  | 1.71180000  | 6.34040000 | 7.40230000 |
| C  | 1.11530000  | 7.92050000 | 4.79540000 |
| C  | -1.46930000 | 8.87350000 | 4.39510000 |
| C  | -3.45530000 | 6.79180000 | 6.92000000 |
| H  | -4.20170000 | 6.95010000 | 6.13230000 |
| H  | -3.85300000 | 6.00260000 | 7.56490000 |
| C  | -3.30790000 | 8.09920000 | 7.74680000 |
| H  | -4.01770000 | 8.82240000 | 7.32650000 |
| H  | -3.68070000 | 7.87270000 | 8.75200000 |
| C  | -1.95990000 | 8.85140000 | 7.92400000 |
| H  | -1.75190000 | 8.96430000 | 8.99490000 |
| H  | -2.05870000 | 9.86660000 | 7.52350000 |
| C  | -0.05120000 | 3.09300000 | 8.62310000 |
| H  | 1.01550000  | 2.95840000 | 8.84690000 |
| H  | -0.61370000 | 2.43580000 | 9.29770000 |
| C  | -0.32350000 | 2.74180000 | 7.14850000 |
| H  | -1.39910000 | 2.78700000 | 6.93240000 |
| H  | 0.00430000  | 1.72120000 | 6.91620000 |

|   |             |            |             |
|---|-------------|------------|-------------|
| C | -0.34650000 | 3.63710000 | 4.39020000  |
| H | -0.10340000 | 2.58740000 | 4.17400000  |
| H | -1.43400000 | 3.70730000 | 4.50910000  |
| C | 0.14280000  | 4.51490000 | 3.22350000  |
| H | -0.07120000 | 4.00880000 | 2.27410000  |
| H | 1.23180000  | 4.62120000 | 3.27540000  |
| C | 0.57070000  | 5.27580000 | 10.46740000 |
| C | 1.12670000  | 6.55430000 | 10.62960000 |
| H | 0.98820000  | 7.30150000 | 9.85170000  |
| C | 1.85890000  | 6.86940000 | 11.77850000 |
| H | 2.28560000  | 7.86440000 | 11.88810000 |
| C | 2.05040000  | 5.90870000 | 12.77310000 |
| H | 2.62710000  | 6.15130000 | 13.66350000 |
| C | 1.49940000  | 4.63200000 | 12.62210000 |
| H | 1.64290000  | 3.88000000 | 13.39580000 |
| C | 0.75910000  | 4.31980000 | 11.48110000 |
| H | 0.32110000  | 3.32830000 | 11.38590000 |
| C | -2.13280000 | 4.85740000 | 9.68300000  |
| C | -3.07980000 | 3.89800000 | 9.28690000  |
| H | -2.82010000 | 3.13980000 | 8.55270000  |
| C | -4.37190000 | 3.90280000 | 9.81980000  |
| H | -5.08750000 | 3.14710000 | 9.50130000  |
| C | -4.74300000 | 4.87070000 | 10.75610000 |
| H | -5.74850000 | 4.87410000 | 11.17180000 |
| C | -3.81130000 | 5.83210000 | 11.15740000 |
| H | -4.08640000 | 6.58700000 | 11.89150000 |
| C | -2.51970000 | 5.82550000 | 10.62600000 |
| H | -1.80220000 | 6.57190000 | 10.95950000 |
| C | 2.17410000  | 3.49850000 | 5.74940000  |
| C | 3.10200000  | 4.43330000 | 5.25400000  |
| H | 2.80150000  | 5.46650000 | 5.10580000  |
| C | 4.41580000  | 4.05570000 | 4.96560000  |
| H | 5.11540000  | 4.79800000 | 4.58710000  |
| C | 4.83100000  | 2.73930000 | 5.17740000  |
| H | 5.85680000  | 2.44670000 | 4.96230000  |
| C | 3.92260000  | 1.80110000 | 5.67280000  |
| H | 4.23670000  | 0.77330000 | 5.84450000  |
| C | 2.60570000  | 2.17620000 | 5.95080000  |
| H | 1.92010000  | 1.42220000 | 6.32830000  |
| C | 0.35870000  | 6.99380000 | 1.74670000  |
| C | -0.28310000 | 7.89830000 | 0.88180000  |
| H | -1.34820000 | 8.08850000 | 0.98940000  |
| C | 0.42930000  | 8.55490000 | -0.12300000 |
| H | -0.08830000 | 9.25050000 | -0.78070000 |
| C | 1.79750000  | 8.32090000 | -0.28350000 |
| H | 2.35290000  | 8.83110000 | -1.06780000 |
| C | 2.44800000  | 7.43150000 | 0.57350000  |
| H | 3.51470000  | 7.24620000 | 0.46330000  |
| C | 1.73700000  | 6.77810000 | 1.58340000  |
| H | 2.27630000  | 6.10870000 | 2.24800000  |

|   |             |            |             |
|---|-------------|------------|-------------|
| C | -2.22500000 | 5.89300000 | 2.31910000  |
| C | -3.41960000 | 6.40940000 | 2.84030000  |
| H | -3.38970000 | 6.99930000 | 3.75000000  |
| C | -4.64100000 | 6.16930000 | 2.20280000  |
| H | -5.55670000 | 6.58070000 | 2.62310000  |
| C | -4.68550000 | 5.40720000 | 1.03480000  |
| H | -5.63590000 | 5.21900000 | 0.53880000  |
| C | -3.50050000 | 4.89280000 | 0.49890000  |
| H | -3.52340000 | 4.30640000 | -0.41780000 |
| C | -2.28230000 | 5.13720000 | 1.13360000  |
| H | -1.36890000 | 4.75330000 | 0.68380000  |

---

### Species B

HF energy= -3841.81232981

No Imaginary frequency

Zero-point correction = 0.692653 (Hartree/Particle)

Thermal correction to Energy = 0.742257

Thermal correction to Enthalpy = 0.743201

Thermal correction to Gibbs Free Energy = 0.607063

Sum of electronic and zero-point Energies = -3841.119676

Sum of electronic and thermal Energies = -3841.070073

Sum of electronic and thermal Enthalpies = -3841.069128

Sum of electronic and thermal Free Energies = -3841.205266

### Coordinates: B

|    |             |            |            |
|----|-------------|------------|------------|
| Fe | -0.04420000 | 6.04880000 | 7.09410000 |
| Fe | -0.54890000 | 7.48440000 | 5.06240000 |
| P  | -0.46940000 | 4.95730000 | 9.02780000 |
| P  | 0.36120000  | 4.07330000 | 6.10870000 |
| P  | -0.62500000 | 6.19130000 | 3.17720000 |
| S  | -2.12970000 | 6.10270000 | 6.05700000 |
| S  | -0.29280000 | 8.36800000 | 7.19730000 |
| O  | 2.75250000  | 6.55680000 | 7.77880000 |
| O  | 2.28320000  | 8.10870000 | 4.63040000 |
| O  | -1.82380000 | 9.86580000 | 3.93370000 |
| C  | 1.65330000  | 6.33460000 | 7.49050000 |
| C  | 1.16600000  | 7.84730000 | 4.79740000 |
| C  | -1.35680000 | 8.88960000 | 4.34780000 |
| C  | -3.42560000 | 7.09170000 | 6.94120000 |
| H  | -3.89420000 | 7.73170000 | 6.18170000 |
| H  | -4.18000000 | 6.37000000 | 7.27520000 |
| C  | -2.96540000 | 7.92900000 | 8.13150000 |
| H  | -3.85290000 | 8.42780000 | 8.55560000 |
| H  | -2.57690000 | 7.26790000 | 8.91410000 |
| C  | -1.92470000 | 8.99400000 | 7.80420000 |
| H  | -1.69930000 | 9.57900000 | 8.70480000 |
| H  | -2.30120000 | 9.69340000 | 7.04670000 |
| C  | 0.06370000  | 3.17140000 | 8.72680000 |

|   |             |            |             |
|---|-------------|------------|-------------|
| H | 1.15060000  | 3.13770000 | 8.88210000  |
| H | -0.40160000 | 2.49010000 | 9.44950000  |
| C | -0.27030000 | 2.75760000 | 7.28300000  |
| H | -1.35740000 | 2.72270000 | 7.13630000  |
| H | 0.10670000  | 1.75190000 | 7.06380000  |
| C | -0.49610000 | 3.61520000 | 4.50910000  |
| H | -0.30370000 | 2.54770000 | 4.33140000  |
| H | -1.57490000 | 3.73640000 | 4.66410000  |
| C | -0.01440000 | 4.41710000 | 3.28640000  |
| H | -0.31980000 | 3.89700000 | 2.37040000  |
| H | 1.08030000  | 4.44350000 | 3.27500000  |
| C | 0.50500000  | 5.43750000 | 10.51990000 |
| C | 0.85060000  | 6.78820000 | 10.68980000 |
| H | 0.56100000  | 7.51410000 | 9.93300000  |
| C | 1.57920000  | 7.20020000 | 11.80880000 |
| H | 1.84250000  | 8.24980000 | 11.92220000 |
| C | 1.98080000  | 6.26730000 | 12.76720000 |
| H | 2.55610000  | 6.58700000 | 13.63390000 |
| C | 1.64690000  | 4.91920000 | 12.60670000 |
| H | 1.95890000  | 4.18660000 | 13.34870000 |
| C | 0.91010000  | 4.50770000 | 11.49410000 |
| H | 0.64740000  | 3.45700000 | 11.39270000 |
| C | -2.17530000 | 4.70040000 | 9.73110000  |
| C | -3.19240000 | 4.18230000 | 8.90680000  |
| H | -2.99620000 | 3.99170000 | 7.85520000  |
| C | -4.47200000 | 3.94260000 | 9.41100000  |
| H | -5.23960000 | 3.53580000 | 8.75510000  |
| C | -4.77020000 | 4.23540000 | 10.74480000 |
| H | -5.76990000 | 4.05630000 | 11.13560000 |
| C | -3.77680000 | 4.76750000 | 11.56800000 |
| H | -3.99710000 | 5.00730000 | 12.60660000 |
| C | -2.49030000 | 4.99380000 | 11.06850000 |
| H | -1.73090000 | 5.40040000 | 11.72990000 |
| C | 2.10160000  | 3.55590000 | 5.72120000  |
| C | 3.01030000  | 4.52100000 | 5.25010000  |
| H | 2.70320000  | 5.55850000 | 5.16710000  |
| C | 4.31450000  | 4.16640000 | 4.89500000  |
| H | 4.99880000  | 4.93410000 | 4.53970000  |
| C | 4.73890000  | 2.84110000 | 5.00930000  |
| H | 5.75710000  | 2.56600000 | 4.74150000  |
| C | 3.84760000  | 1.87060000 | 5.47260000  |
| H | 4.16670000  | 0.83420000 | 5.56550000  |
| C | 2.54130000  | 2.22400000 | 5.81960000  |
| H | 1.87020000  | 1.44300000 | 6.16730000  |
| C | 0.40120000  | 6.84760000 | 1.77830000  |
| C | -0.16830000 | 7.75180000 | 0.86410000  |
| H | -1.22440000 | 8.00020000 | 0.93300000  |
| C | 0.60480000  | 8.33420000 | -0.14190000 |
| H | 0.14230000  | 9.03070000 | -0.83840000 |
| C | 1.96280000  | 8.02530000 | -0.25380000 |

|   |             |            |             |
|---|-------------|------------|-------------|
| H | 2.56520000  | 8.47730000 | -1.03910000 |
| C | 2.54250000  | 7.13690000 | 0.65360000  |
| H | 3.60100000  | 6.89450000 | 0.58220000  |
| C | 1.77120000  | 6.55800000 | 1.66450000  |
| H | 2.25790000  | 5.88870000 | 2.36910000  |
| C | -2.26470000 | 5.94690000 | 2.33400000  |
| C | -3.43140000 | 6.53550000 | 2.84090000  |
| H | -3.37660000 | 7.12440000 | 3.74970000  |
| C | -4.65920000 | 6.36340000 | 2.19340000  |
| H | -5.55290000 | 6.82930000 | 2.60380000  |
| C | -4.73800000 | 5.59880000 | 1.02890000  |
| H | -5.69340000 | 5.46350000 | 0.52540000  |
| C | -3.58040000 | 5.01290000 | 0.50660000  |
| H | -3.62930000 | 4.42380000 | -0.40730000 |
| C | -2.35610000 | 5.18860000 | 1.15180000  |
| H | -1.46270000 | 4.74880000 | 0.71290000  |

---

### Species A\_alt

HF energy= -3841.79355711

No imaginary frequency

Zero-point correction = 0.692796 (Hartree/Particle)

Thermal correction to Energy = 0.742328

Thermal correction to Enthalpy = 0.743272

Thermal correction to Gibbs Free Energy = 0.608161

Sum of electronic and zero-point Energies = -3841.100761

Sum of electronic and thermal Energies = -3841.051229

Sum of electronic and thermal Enthalpies = -3841.050285

Sum of electronic and thermal Free Energies = -3841.185396

### Coordinates: A\_alt

|    |             |             |             |
|----|-------------|-------------|-------------|
| Fe | 1.29340000  | 0.45760000  | 0.21000000  |
| Fe | -1.08710000 | -0.01900000 | 0.88080000  |
| P  | 3.33840000  | 1.36900000  | 0.19730000  |
| P  | 0.82930000  | 1.56940000  | -1.66570000 |
| P  | -1.47460000 | -1.29350000 | -0.96050000 |
| S  | 0.75000000  | -1.24560000 | 1.68480000  |
| S  | 0.12260000  | 1.80650000  | 1.67990000  |
| O  | 2.31470000  | -1.78120000 | -1.35690000 |
| O  | -3.01920000 | -1.07030000 | 2.81590000  |
| O  | -2.88480000 | 2.03720000  | -0.18340000 |
| C  | 1.87820000  | -0.87940000 | -0.76460000 |
| C  | -2.26070000 | -0.64820000 | 2.04860000  |
| C  | -2.17010000 | 1.21310000  | 0.20080000  |
| C  | 3.54270000  | 2.12370000  | -1.53770000 |
| H  | 3.41510000  | 3.20790000  | -1.43520000 |
| H  | 4.55950000  | 1.95380000  | -1.90970000 |
| C  | 2.49740000  | 1.57650000  | -2.53470000 |
| H  | 2.73600000  | 0.54330000  | -2.81590000 |

|   |             |             |             |
|---|-------------|-------------|-------------|
| H | 2.49720000  | 2.17910000  | -3.45140000 |
| C | -0.39490000 | 0.71650000  | -2.81390000 |
| H | -1.32370000 | 1.28890000  | -2.70510000 |
| H | -0.06460000 | 0.86090000  | -3.85290000 |
| C | -0.65510000 | -0.78470000 | -2.58570000 |
| H | 0.28070000  | -1.34670000 | -2.64220000 |
| H | -1.28270000 | -1.14960000 | -3.40920000 |
| C | 1.07910000  | -0.90470000 | 3.47590000  |
| H | 0.78890000  | -1.82040000 | 4.00640000  |
| H | 2.16860000  | -0.80240000 | 3.57330000  |
| C | 0.71060000  | 1.62650000  | 3.42560000  |
| H | 1.79360000  | 1.80430000  | 3.41960000  |
| H | 0.24300000  | 2.45090000  | 3.97720000  |
| C | 3.77730000  | 2.78010000  | 1.31790000  |
| C | 4.65390000  | 2.60540000  | 2.40220000  |
| H | 5.14640000  | 1.64870000  | 2.55410000  |
| C | 4.91220000  | 3.65510000  | 3.28860000  |
| H | 5.59710000  | 3.49870000  | 4.11990000  |
| C | 4.30150000  | 4.89730000  | 3.10640000  |
| H | 4.50620000  | 5.71530000  | 3.79410000  |
| C | 3.42180000  | 5.08080000  | 2.03580000  |
| H | 2.93480000  | 6.04260000  | 1.88640000  |
| C | 3.15570000  | 4.03110000  | 1.15540000  |
| H | 2.44690000  | 4.19090000  | 0.34670000  |
| C | 4.82350000  | 0.27510000  | 0.36930000  |
| C | 4.67680000  | -1.00070000 | 0.93500000  |
| H | 3.69070000  | -1.33880000 | 1.24500000  |
| C | 5.78350000  | -1.84150000 | 1.09220000  |
| H | 5.65010000  | -2.82970000 | 1.52790000  |
| C | 7.04930000  | -1.41860000 | 0.68410000  |
| H | 7.90960000  | -2.07490000 | 0.80110000  |
| C | 7.20970000  | -0.14660000 | 0.12440000  |
| H | 8.19500000  | 0.19200000  | -0.19060000 |
| C | 6.10670000  | 0.69430000  | -0.02730000 |
| H | 6.25330000  | 1.69020000  | -0.44130000 |
| C | 0.30910000  | 3.33360000  | -1.94020000 |
| C | -0.09140000 | 4.16220000  | -0.88060000 |
| H | -0.10170000 | 3.77340000  | 0.13320000  |
| C | -0.48830000 | 5.48290000  | -1.11980000 |
| H | -0.79860000 | 6.10680000  | -0.28390000 |
| C | -0.49590000 | 5.99420000  | -2.41780000 |
| H | -0.80680000 | 7.02080000  | -2.60190000 |
| C | -0.10560000 | 5.17750000  | -3.48370000 |
| H | -0.11150000 | 5.56460000  | -4.50100000 |
| C | 0.29210000  | 3.86140000  | -3.24620000 |
| H | 0.58730000  | 3.24410000  | -4.09270000 |
| C | -3.27960000 | -1.29610000 | -1.42390000 |
| C | -4.17550000 | -2.00740000 | -0.60580000 |
| H | -3.79940000 | -2.57610000 | 0.24140000  |
| C | -5.54500000 | -2.00310000 | -0.86910000 |

|   |             |             |             |
|---|-------------|-------------|-------------|
| H | -6.21750000 | -2.56630000 | -0.22500000 |
| C | -6.05110000 | -1.27810000 | -1.95240000 |
| H | -7.12000000 | -1.27090000 | -2.15620000 |
| C | -5.17500000 | -0.56220000 | -2.76830000 |
| H | -5.55620000 | 0.00940000  | -3.61250000 |
| C | -3.80080000 | -0.57160000 | -2.50700000 |
| H | -3.14670000 | 0.00090000  | -3.15910000 |
| C | -1.13670000 | -3.11810000 | -0.93860000 |
| C | -0.95880000 | -3.86010000 | -2.11960000 |
| H | -0.97550000 | -3.36830000 | -3.08850000 |
| C | -0.76710000 | -5.24180000 | -2.07180000 |
| H | -0.62710000 | -5.79770000 | -2.99700000 |
| C | -0.76010000 | -5.90810000 | -0.84320000 |
| H | -0.61140000 | -6.98560000 | -0.80680000 |
| C | -0.94520000 | -5.18370000 | 0.33530000  |
| H | -0.93880000 | -5.69210000 | 1.29750000  |
| C | -1.12780000 | -3.79870000 | 0.28890000  |
| H | -1.24840000 | -3.24120000 | 1.21200000  |
| C | 0.37770000  | 0.29960000  | 4.09720000  |
| H | 0.67640000  | 0.35880000  | 5.15690000  |
| H | -0.70810000 | 0.14670000  | 4.08600000  |

---

### Species C

HF energy= -3841.81352471

No Imaginary frequency

Zero-point correction = 0.692461 (Hartree/Particle)

Thermal correction to Energy = 0.742150

Thermal correction to Enthalpy = 0.743094

Thermal correction to Gibbs Free Energy = 0.607012

Sum of electronic and zero-point Energies = -3841.121064

Sum of electronic and thermal Energies = -3841.071375

Sum of electronic and thermal Enthalpies = -3841.070431

Sum of electronic and thermal Free Energies = -3841.206512

### Coordinates: C

|    |             |             |             |
|----|-------------|-------------|-------------|
| Fe | 1.02150000  | 0.38860000  | 0.75410000  |
| Fe | -1.25560000 | -0.77920000 | 1.00170000  |
| P  | 2.59140000  | -0.90400000 | -0.39070000 |
| P  | 0.72220000  | 1.47340000  | -1.22520000 |
| P  | -2.79780000 | 0.07000000  | -0.42730000 |
| S  | 0.62240000  | -1.26850000 | 2.28290000  |
| S  | -0.82800000 | 1.42070000  | 1.64880000  |
| O  | 2.83640000  | 2.17970000  | 2.15640000  |
| O  | -0.41980000 | -2.58570000 | -1.13550000 |
| O  | -3.08930000 | -2.42860000 | 2.57160000  |
| C  | 2.16960000  | 1.44760000  | 1.55130000  |
| C  | -0.69280000 | -1.85780000 | -0.26590000 |
| C  | -2.39710000 | -1.71580000 | 1.97070000  |

|   |             |             |             |
|---|-------------|-------------|-------------|
| C | 2.24210000  | -0.65060000 | -2.20150000 |
| H | 3.03630000  | -1.04040000 | -2.84950000 |
| H | 1.33830000  | -1.23600000 | -2.40920000 |
| C | 1.98440000  | 0.84150000  | -2.45830000 |
| H | 1.64870000  | 1.00670000  | -3.49060000 |
| H | 2.90240000  | 1.42490000  | -2.31310000 |
| C | -0.84560000 | 1.17940000  | -2.21510000 |
| H | -0.77970000 | 1.80970000  | -3.11300000 |
| H | -0.81040000 | 0.13580000  | -2.55420000 |
| C | -2.16790000 | 1.47830000  | -1.48030000 |
| H | -2.94760000 | 1.76030000  | -2.19920000 |
| H | -2.05870000 | 2.33360000  | -0.80290000 |
| C | 0.47480000  | -0.61330000 | 4.00950000  |
| H | 0.39300000  | -1.49860000 | 4.65220000  |
| H | 1.43140000  | -0.12530000 | 4.24040000  |
| C | -0.66080000 | 1.62650000  | 3.48310000  |
| H | 0.26680000  | 2.18390000  | 3.66610000  |
| H | -1.49570000 | 2.27260000  | 3.78220000  |
| C | 4.36260000  | -0.36830000 | -0.19680000 |
| C | 4.87600000  | -0.20980000 | 1.10220000  |
| H | 4.22860000  | -0.36430000 | 1.96150000  |
| C | 6.20790000  | 0.15200000  | 1.30910000  |
| H | 6.58220000  | 0.26630000  | 2.32450000  |
| C | 7.05150000  | 0.37890000  | 0.21880000  |
| H | 8.08750000  | 0.67040000  | 0.37860000  |
| C | 6.55420000  | 0.23260000  | -1.07720000 |
| H | 7.20160000  | 0.40670000  | -1.93470000 |
| C | 5.22380000  | -0.14410000 | -1.28290000 |
| H | 4.87080000  | -0.26330000 | -2.30370000 |
| C | 2.78940000  | -2.73860000 | -0.22430000 |
| C | 3.15140000  | -3.27500000 | 1.02370000  |
| H | 3.27850000  | -2.62130000 | 1.88090000  |
| C | 3.33860000  | -4.64860000 | 1.18260000  |
| H | 3.61580000  | -5.04290000 | 2.15820000  |
| C | 3.16210000  | -5.51250000 | 0.09890000  |
| H | 3.30420000  | -6.58410000 | 0.22380000  |
| C | 2.79780000  | -4.99220000 | -1.14390000 |
| H | 2.65290000  | -5.65530000 | -1.99460000 |
| C | 2.61270000  | -3.61670000 | -1.30510000 |
| H | 2.32030000  | -3.24220000 | -2.28100000 |
| C | 0.89700000  | 3.31030000  | -1.38250000 |
| C | 0.86780000  | 4.12630000  | -0.24130000 |
| H | 0.73240000  | 3.67460000  | 0.73630000  |
| C | 1.00230000  | 5.51360000  | -0.35420000 |
| H | 0.97620000  | 6.13010000  | 0.54210000  |
| C | 1.17120000  | 6.10430000  | -1.60740000 |
| H | 1.27900000  | 7.18370000  | -1.69420000 |
| C | 1.20240000  | 5.30270000  | -2.75280000 |
| H | 1.33610000  | 5.75490000  | -3.73380000 |
| C | 1.06290000  | 3.91880000  | -2.64050000 |



|   |             |             |             |
|---|-------------|-------------|-------------|
| H | 1.09070000  | 3.31280000  | -3.54440000 |
| C | -4.34070000 | 0.83230000  | 0.26640000  |
| C | -4.45700000 | 1.07890000  | 1.64180000  |
| H | -3.63980000 | 0.80420000  | 2.30140000  |
| C | -5.61100000 | 1.67160000  | 2.16250000  |
| H | -5.68690000 | 1.85270000  | 3.23300000  |
| C | -6.66240000 | 2.02570000  | 1.31500000  |
| H | -7.56170000 | 2.48490000  | 1.72100000  |
| C | -6.55870000 | 1.78080000  | -0.05770000 |
| H | -7.37720000 | 2.04630000  | -0.72430000 |
| C | -5.40800000 | 1.18620000  | -0.57730000 |
| H | -5.35050000 | 0.98040000  | -1.64420000 |
| C | -3.50550000 | -1.12150000 | -1.65870000 |
| C | -3.55870000 | -0.88500000 | -3.04150000 |
| H | -3.16820000 | 0.03810000  | -3.46160000 |
| C | -4.11210000 | -1.83290000 | -3.90880000 |
| H | -4.14000000 | -1.63120000 | -4.97810000 |
| C | -4.62560000 | -3.02920000 | -3.40680000 |
| H | -5.05590000 | -3.76630000 | -4.08180000 |
| C | -4.57990000 | -3.27610000 | -2.03150000 |
| H | -4.97410000 | -4.20690000 | -1.62880000 |
| C | -4.02030000 | -2.33500000 | -1.16750000 |
| H | -3.98010000 | -2.54710000 | -0.10210000 |
| C | -0.68850000 | 0.33390000  | 4.29260000  |
| H | -0.66500000 | 0.59480000  | 5.36370000  |
| H | -1.63680000 | -0.18880000 | 4.11620000  |

---

### Species TSCD

HF energy= -3841.79675387

One imaginary frequency (*247i*)

Zero-point correction = 0.692139 (Hartree/Particle)

Thermal correction to Energy = 0.741506

Thermal correction to Enthalpy = 0.742451

Thermal correction to Gibbs Free Energy = 0.605874

Sum of electronic and zero-point Energies = -3841.104615

Sum of electronic and thermal Energies = -3841.055248

Sum of electronic and thermal Enthalpies = -3841.054303

Sum of electronic and thermal Free Energies = -3841.190880

### Coordinates: TSCD

|    |             |             |             |
|----|-------------|-------------|-------------|
| Fe | 1.07880000  | 0.40800000  | 0.70680000  |
| Fe | -1.19920000 | -0.79400000 | 0.96480000  |
| P  | 2.63040000  | -0.89310000 | -0.44830000 |
| P  | 0.74840000  | 1.47390000  | -1.27250000 |
| P  | -2.75550000 | 0.06460000  | -0.44600000 |
| S  | 0.67270000  | -1.26460000 | 2.20600000  |
| S  | -0.76750000 | 1.37920000  | 1.61870000  |
| O  | 2.90440000  | 2.23640000  | 2.04780000  |

|   |             |             |             |
|---|-------------|-------------|-------------|
| O | -0.42460000 | -2.66970000 | -1.14170000 |
| O | -2.99310000 | -2.35650000 | 2.66510000  |
| C | 2.23020000  | 1.48730000  | 1.47200000  |
| C | -0.69010000 | -1.91980000 | -0.29080000 |
| C | -2.32040000 | -1.68370000 | 1.99990000  |
| C | 2.26080000  | -0.64860000 | -2.25650000 |
| H | 3.04760000  | -1.04130000 | -2.91180000 |
| H | 1.35440000  | -1.23460000 | -2.45240000 |
| C | 2.00040000  | 0.84250000  | -2.51590000 |
| H | 1.65580000  | 1.00420000  | -3.54590000 |
| H | 2.91980000  | 1.42600000  | -2.37990000 |
| C | -0.82580000 | 1.17830000  | -2.25210000 |
| H | -0.76510000 | 1.81120000  | -3.14860000 |
| H | -0.79140000 | 0.13540000  | -2.59380000 |
| C | -2.14300000 | 1.47400000  | -1.50810000 |
| H | -2.92980000 | 1.75220000  | -2.22080000 |
| H | -2.03070000 | 2.33110000  | -0.83320000 |
| C | 0.35580000  | -0.80980000 | 3.96660000  |
| H | -0.39700000 | -1.53940000 | 4.28350000  |
| H | 1.28240000  | -1.07550000 | 4.48930000  |
| C | -0.49880000 | 1.71790000  | 3.41320000  |
| H | 0.24510000  | 2.52200000  | 3.42340000  |
| H | -1.44150000 | 2.16500000  | 3.75020000  |
| C | 4.40440000  | -0.36000000 | -0.27520000 |
| C | 4.92580000  | -0.18510000 | 1.01850000  |
| H | 4.28200000  | -0.32410000 | 1.88340000  |
| C | 6.26020000  | 0.17440000  | 1.21250000  |
| H | 6.64110000  | 0.30180000  | 2.22390000  |
| C | 7.09800000  | 0.38300000  | 0.11410000  |
| H | 8.13610000  | 0.67290000  | 0.26360000  |
| C | 6.59250000  | 0.22050000  | -1.17700000 |
| H | 7.23550000  | 0.38060000  | -2.04040000 |
| C | 5.25960000  | -0.15430000 | -1.36960000 |
| H | 4.89990000  | -0.28700000 | -2.38640000 |
| C | 2.82950000  | -2.72730000 | -0.27710000 |
| C | 3.21020000  | -3.25780000 | 0.96790000  |
| H | 3.35270000  | -2.59930000 | 1.81910000  |
| C | 3.39900000  | -4.63050000 | 1.13100000  |
| H | 3.69110000  | -5.02020000 | 2.10410000  |
| C | 3.20560000  | -5.49980000 | 0.05440000  |
| H | 3.34920000  | -6.57090000 | 0.18240000  |
| C | 2.82300000  | -4.98550000 | -1.18540000 |
| H | 2.66510000  | -5.65280000 | -2.03050000 |
| C | 2.63620000  | -3.61070000 | -1.35070000 |
| H | 2.32980000  | -3.24110000 | -2.32420000 |
| C | 0.91320000  | 3.31190000  | -1.43390000 |
| C | 0.85110000  | 4.13060000  | -0.29600000 |
| H | 0.70180000  | 3.67920000  | 0.67980000  |
| C | 0.97200000  | 5.51900000  | -0.40950000 |
| H | 0.92060000  | 6.13740000  | 0.48440000  |

|   |             |             |             |
|---|-------------|-------------|-------------|
| C | 1.16070000  | 6.10840000  | -1.66050000 |
| H | 1.25870000  | 7.18870000  | -1.74780000 |
| C | 1.22450000  | 5.30430000  | -2.80270000 |
| H | 1.37360000  | 5.75560000  | -3.78190000 |
| C | 1.09780000  | 3.91920000  | -2.68970000 |
| H | 1.14980000  | 3.31160000  | -3.59140000 |
| C | -4.28700000 | 0.83080000  | 0.27050000  |
| C | -4.37690000 | 1.09130000  | 1.64550000  |
| H | -3.54670000 | 0.82430000  | 2.29220000  |
| C | -5.52160000 | 1.68770000  | 2.18230000  |
| H | -5.57700000 | 1.87950000  | 3.25220000  |
| C | -6.58990000 | 2.03170000  | 1.35200000  |
| H | -7.48200000 | 2.49350000  | 1.77080000  |
| C | -6.51240000 | 1.77330000  | -0.01990000 |
| H | -7.34400000 | 2.03110000  | -0.67310000 |
| C | -5.37100000 | 1.17530000  | -0.55570000 |
| H | -5.33330000 | 0.95940000  | -1.62150000 |
| C | -3.48530000 | -1.12570000 | -1.66480000 |
| C | -3.54690000 | -0.89860000 | -3.04860000 |
| H | -3.15130000 | 0.01800000  | -3.47820000 |
| C | -4.11600000 | -1.84770000 | -3.90470000 |
| H | -4.15020000 | -1.65350000 | -4.97520000 |
| C | -4.63710000 | -3.03510000 | -3.38980000 |
| H | -5.07960000 | -3.77300000 | -4.05600000 |
| C | -4.58330000 | -3.27250000 | -2.01300000 |
| H | -4.98350000 | -4.19640000 | -1.60060000 |
| C | -4.00800000 | -2.33050000 | -1.16050000 |
| H | -3.96090000 | -2.53390000 | -0.09340000 |
| C | -0.07750000 | 0.61170000  | 4.41660000  |
| H | 0.74240000  | 1.03150000  | 5.01260000  |
| H | -0.90740000 | 0.47370000  | 5.12100000  |

---

### Species D

HF energy= -3841.81241277

No Imaginary frequency

Zero-point correction = 0.692432 (Hartree/Particle)

Thermal correction to Energy = 0.742135

Thermal correction to Enthalpy = 0.743079

Thermal correction to Gibbs Free Energy = 0.606374

Sum of electronic and zero-point Energies = -3841.119980

Sum of electronic and thermal Energies = -3841.070278

Sum of electronic and thermal Enthalpies = -3841.069334

Sum of electronic and thermal Free Energies = -3841.206038

### Coordinates: D

|    |             |             |             |
|----|-------------|-------------|-------------|
| Fe | 1.09250000  | 0.43930000  | 0.72240000  |
| Fe | -1.17800000 | -0.74760000 | 0.99560000  |
| P  | 2.61810000  | -0.88650000 | -0.43870000 |

|   |             |             |             |
|---|-------------|-------------|-------------|
| P | 0.74520000  | 1.49550000  | -1.25950000 |
| P | -2.73570000 | 0.08510000  | -0.43070000 |
| S | 0.70230000  | -1.24130000 | 2.24620000  |
| S | -0.76420000 | 1.43590000  | 1.65040000  |
| O | 3.00280000  | 2.31150000  | 1.87910000  |
| O | -0.45710000 | -2.73330000 | -1.03060000 |
| O | -2.98830000 | -2.22130000 | 2.75690000  |
| C | 2.28420000  | 1.53750000  | 1.39860000  |
| C | -0.70480000 | -1.94120000 | -0.21500000 |
| C | -2.30920000 | -1.58300000 | 2.06510000  |
| C | 2.24190000  | -0.63720000 | -2.24430000 |
| H | 3.02170000  | -1.03650000 | -2.90390000 |
| H | 1.32890000  | -1.21420000 | -2.43730000 |
| C | 1.99460000  | 0.85640000  | -2.50090000 |
| H | 1.65170000  | 1.02160000  | -3.53080000 |
| H | 2.91910000  | 1.43160000  | -2.36410000 |
| C | -0.82580000 | 1.21310000  | -2.24730000 |
| H | -0.76110000 | 1.86180000  | -3.13220000 |
| H | -0.79090000 | 0.17630000  | -2.60660000 |
| C | -2.14340000 | 1.49580000  | -1.50170000 |
| H | -2.93570000 | 1.76000000  | -2.21360000 |
| H | -2.04010000 | 2.35800000  | -0.83180000 |
| C | 0.45700000  | -0.65310000 | 3.98490000  |
| H | -0.48490000 | -1.09130000 | 4.33820000  |
| H | 1.26760000  | -1.10970000 | 4.56700000  |
| C | -0.66100000 | 1.61100000  | 3.49410000  |
| H | -0.56640000 | 2.68600000  | 3.69220000  |
| H | -1.63530000 | 1.28920000  | 3.88510000  |
| C | 4.40040000  | -0.38000000 | -0.27330000 |
| C | 4.92920000  | -0.21760000 | 1.01900000  |
| H | 4.28560000  | -0.34750000 | 1.88560000  |
| C | 6.27020000  | 0.11870000  | 1.20890000  |
| H | 6.65710000  | 0.23670000  | 2.21910000  |
| C | 7.10700000  | 0.31660000  | 0.10770000  |
| H | 8.15040000  | 0.58840000  | 0.25410000  |
| C | 6.59390000  | 0.16710000  | -1.18190000 |
| H | 7.23630000  | 0.31930000  | -2.04720000 |
| C | 5.25430000  | -0.18500000 | -1.37050000 |
| H | 4.88850000  | -0.30840000 | -2.38630000 |
| C | 2.79640000  | -2.72350000 | -0.27150000 |
| C | 3.17470000  | -3.26280000 | 0.97040000  |
| H | 3.32270000  | -2.60990000 | 1.82470000  |
| C | 3.35290000  | -4.63780000 | 1.12660000  |
| H | 3.64260000  | -5.03430000 | 2.09770000  |
| C | 3.15230000  | -5.50040000 | 0.04610000  |
| H | 3.28760000  | -6.57320000 | 0.16890000  |
| C | 2.77360000  | -4.97720000 | -1.19110000 |
| H | 2.61050000  | -5.63890000 | -2.03950000 |
| C | 2.59710000  | -3.60020000 | -1.34940000 |
| H | 2.29370000  | -3.22430000 | -2.32150000 |

|   |             |             |             |
|---|-------------|-------------|-------------|
| C | 0.91830000  | 3.33310000  | -1.41940000 |
| C | 0.79230000  | 4.15570000  | -0.28940000 |
| H | 0.59220000  | 3.70650000  | 0.67860000  |
| C | 0.91260000  | 5.54420000  | -0.40250000 |
| H | 0.81110000  | 6.16580000  | 0.48500000  |
| C | 1.16490000  | 6.12980000  | -1.64400000 |
| H | 1.26330000  | 7.21010000  | -1.73020000 |
| C | 1.29180000  | 5.32170000  | -2.77800000 |
| H | 1.49010000  | 5.76990000  | -3.74990000 |
| C | 1.16500000  | 3.93640000  | -2.66650000 |
| H | 1.26500000  | 3.32620000  | -3.56220000 |
| C | -4.28160000 | 0.84020000  | 0.26930000  |
| C | -4.37770000 | 1.13270000  | 1.63730000  |
| H | -3.54460000 | 0.89630000  | 2.29120000  |
| C | -5.53200000 | 1.72370000  | 2.15920000  |
| H | -5.59080000 | 1.94070000  | 3.22410000  |
| C | -6.60490000 | 2.03060000  | 1.32050000  |
| H | -7.50460000 | 2.48820000  | 1.72760000  |
| C | -6.52160000 | 1.74090000  | -0.04470000 |
| H | -7.35630000 | 1.96980000  | -0.70470000 |
| C | -5.37020000 | 1.14840000  | -0.56530000 |
| H | -5.32840000 | 0.90880000  | -1.62580000 |
| C | -3.45050000 | -1.12230000 | -1.64220000 |
| C | -3.51000000 | -0.90830000 | -3.02820000 |
| H | -3.12220000 | 0.00820000  | -3.46480000 |
| C | -4.06850000 | -1.86980000 | -3.87750000 |
| H | -4.10140000 | -1.68530000 | -4.94970000 |
| C | -4.58120000 | -3.05690000 | -3.35350000 |
| H | -5.01570000 | -3.80430000 | -4.01430000 |
| C | -4.53000000 | -3.28110000 | -1.97440000 |
| H | -4.92420000 | -4.20450000 | -1.55490000 |
| C | -3.96530000 | -2.32680000 | -1.12880000 |
| H | -3.92030000 | -2.51980000 | -0.05950000 |
| C | 0.46760000  | 0.85860000  | 4.19560000  |
| H | 1.43540000  | 1.26700000  | 3.88210000  |
| H | 0.38290000  | 1.05710000  | 5.27700000  |

---

**Species C\_alt**

HF energy= -3841.79222866

No Imaginary frequency

Zero-point correction = 0.692219 (Hartree/Particle)

Thermal correction to Energy = 0.741957

Thermal correction to Enthalpy = 0.742902

Thermal correction to Gibbs Free Energy = 0.606399

Sum of electronic and zero-point Energies = -3841.100009

Sum of electronic and thermal Energies = -3841.050271

Sum of electronic and thermal Enthalpies = -3841.049327

Sum of electronic and thermal Free Energies = -3841.185830

Coordinates: C\_alt

|    |             |             |             |
|----|-------------|-------------|-------------|
| Fe | 1.30090000  | 0.44520000  | 0.52330000  |
| Fe | -1.14180000 | -0.43920000 | 0.89500000  |
| P  | 2.93890000  | -0.41140000 | -0.95030000 |
| P  | 0.64700000  | 1.65870000  | -1.23010000 |
| P  | -1.43560000 | -1.49060000 | -1.07870000 |
| S  | 0.81580000  | -1.53230000 | 1.53330000  |
| S  | -0.21040000 | 1.35910000  | 1.99840000  |
| O  | 3.27310000  | 2.03880000  | 1.95130000  |
| O  | -2.98870000 | -1.89440000 | 2.63610000  |
| O  | -3.11090000 | 1.57100000  | 0.05990000  |
| C  | 2.55300000  | 1.37130000  | 1.32840000  |
| C  | -2.25160000 | -1.31480000 | 1.95400000  |
| C  | -2.32480000 | 0.77410000  | 0.34840000  |
| C  | 2.91810000  | 0.64730000  | -2.51490000 |
| H  | 3.93570000  | 0.82120000  | -2.88480000 |
| H  | 2.40450000  | 0.04790000  | -3.27630000 |
| C  | 2.16280000  | 1.96360000  | -2.29340000 |
| H  | 1.89110000  | 2.43010000  | -3.25050000 |
| H  | 2.77790000  | 2.68480000  | -1.74010000 |
| C  | -0.49730000 | 0.83520000  | -2.48720000 |
| H  | -1.50810000 | 1.20480000  | -2.28220000 |
| H  | -0.22890000 | 1.19680000  | -3.49090000 |
| C  | -0.49600000 | -0.71090000 | -2.49840000 |
| H  | 0.51890000  | -1.11720000 | -2.43430000 |
| H  | -0.90800000 | -1.06020000 | -3.45460000 |
| C  | 1.04300000  | -1.47030000 | 3.37430000  |
| H  | 0.87500000  | -2.49290000 | 3.73570000  |
| H  | 2.10310000  | -1.23400000 | 3.53230000  |
| C  | 0.28730000  | 0.96120000  | 3.73890000  |
| H  | 1.31830000  | 1.31550000  | 3.86240000  |
| H  | -0.35480000 | 1.58490000  | 4.37270000  |
| C  | 4.65650000  | -0.18440000 | -0.29000000 |
| C  | 5.21780000  | -1.18900000 | 0.51660000  |
| H  | 4.66800000  | -2.11060000 | 0.69530000  |
| C  | 6.48260000  | -1.02290000 | 1.08260000  |
| H  | 6.90290000  | -1.81340000 | 1.70140000  |
| C  | 7.20830000  | 0.14960000  | 0.85240000  |
| H  | 8.19500000  | 0.27820000  | 1.29250000  |
| C  | 6.65820000  | 1.15550000  | 0.05610000  |
| H  | 7.21230000  | 2.07440000  | -0.12550000 |
| C  | 5.38990000  | 0.99140000  | -0.50760000 |
| H  | 4.97410000  | 1.79700000  | -1.10850000 |
| C  | 3.13070000  | -2.10490000 | -1.69280000 |
| C  | 2.49310000  | -3.21970000 | -1.13010000 |
| H  | 1.85440000  | -3.09330000 | -0.26160000 |
| C  | 2.68080000  | -4.49550000 | -1.67500000 |
| H  | 2.16940000  | -5.34480000 | -1.22860000 |
| C  | 3.50270000  | -4.67220000 | -2.78770000 |

|   |             |             |             |
|---|-------------|-------------|-------------|
| H | 3.64490000  | -5.66430000 | -3.21220000 |
| C | 4.14700000  | -3.56780000 | -3.35560000 |
| H | 4.79600000  | -3.69700000 | -4.21990000 |
| C | 3.96760000  | -2.29740000 | -2.80960000 |
| H | 4.49560000  | -1.45520000 | -3.25120000 |
| C | -0.02420000 | 3.37440000  | -1.11180000 |
| C | 0.43810000  | 4.18620000  | -0.06140000 |
| H | 1.11490000  | 3.77050000  | 0.67970000  |
| C | 0.02390000  | 5.51540000  | 0.04690000  |
| H | 0.39020000  | 6.12660000  | 0.86940000  |
| C | -0.86670000 | 6.05200000  | -0.88570000 |
| H | -1.19680000 | 7.08520000  | -0.79630000 |
| C | -1.33540000 | 5.25450000  | -1.93230000 |
| H | -2.03040000 | 5.66360000  | -2.66310000 |
| C | -0.91510000 | 3.92730000  | -2.04690000 |
| H | -1.28950000 | 3.33120000  | -2.87500000 |
| C | -3.20150000 | -1.43670000 | -1.66850000 |
| C | -4.16990000 | -2.08180000 | -0.87770000 |
| H | -3.87080000 | -2.59360000 | 0.03390000  |
| C | -5.51470000 | -2.07940000 | -1.24680000 |
| H | -6.24460000 | -2.58770000 | -0.62000000 |
| C | -5.92280000 | -1.42330000 | -2.41220000 |
| H | -6.97270000 | -1.41490000 | -2.69770000 |
| C | -4.97380000 | -0.77810000 | -3.20510000 |
| H | -5.27920000 | -0.26290000 | -4.11400000 |
| C | -3.62360000 | -0.78740000 | -2.83850000 |
| H | -2.91100000 | -0.27520000 | -3.47870000 |
| C | -1.11120000 | -3.30330000 | -1.30030000 |
| C | -1.09320000 | -3.89840000 | -2.57380000 |
| H | -1.21040000 | -3.28810000 | -3.46630000 |
| C | -0.94640000 | -5.27890000 | -2.71260000 |
| H | -0.93450000 | -5.72310000 | -3.70600000 |
| C | -0.82670000 | -6.08920000 | -1.57870000 |
| H | -0.72280000 | -7.16730000 | -1.68710000 |
| C | -0.84780000 | -5.50950000 | -0.30850000 |
| H | -0.75790000 | -6.13230000 | 0.57950000  |
| C | -0.98670000 | -4.12460000 | -0.16980000 |
| H | -0.98900000 | -3.67640000 | 0.81910000  |
| C | 0.15780000  | -0.50090000 | 4.15490000  |
| H | 0.42830000  | -0.58090000 | 5.22090000  |
| H | -0.89080000 | -0.80980000 | 4.07920000  |

---

**Species A<sub>ox</sub>**

HF energy= -3841.64381641

No Imaginary frequency

Zero-point correction = 0.692144 (Hartree/Particle)

Thermal correction to Energy = 0.742872

Thermal correction to Enthalpy = 0.743817

Thermal correction to Gibbs Free Energy = 0.602927  
 Sum of electronic and zero-point Energies = -3840.951672  
 Sum of electronic and thermal Energies = -3840.900944  
 Sum of electronic and thermal Enthalpies = -3840.900000  
 Sum of electronic and thermal Free Energies = -3841.040889

Coordinates:  $A_{ox}$

|    |             |             |             |
|----|-------------|-------------|-------------|
| Fe | 0.02460000  | 6.24970000  | 7.10820000  |
| Fe | -0.49790000 | 7.62550000  | 4.88250000  |
| P  | -0.53170000 | 4.95390000  | 9.11700000  |
| P  | 0.50300000  | 4.20880000  | 5.98100000  |
| P  | -0.59100000 | 6.30070000  | 2.98930000  |
| S  | -2.01980000 | 6.24750000  | 6.03730000  |
| S  | -0.09690000 | 8.57560000  | 6.98110000  |
| O  | 2.82120000  | 6.64320000  | 8.00350000  |
| O  | 2.29490000  | 8.33950000  | 4.26680000  |
| O  | -1.85300000 | 9.94180000  | 3.63150000  |
| C  | 1.74140000  | 6.46650000  | 7.66040000  |
| C  | 1.19910000  | 8.06350000  | 4.48070000  |
| C  | -1.34700000 | 9.02120000  | 4.09700000  |
| C  | -3.25270000 | 7.22560000  | 7.01810000  |
| H  | -4.21210000 | 7.05810000  | 6.51460000  |
| H  | -3.31540000 | 6.75760000  | 8.00660000  |
| C  | -2.97820000 | 8.72160000  | 7.13670000  |
| H  | -3.01250000 | 9.19250000  | 6.14770000  |
| H  | -3.79920000 | 9.16690000  | 7.72030000  |
| C  | -1.67000000 | 9.07860000  | 7.83370000  |
| H  | -1.63570000 | 8.65250000  | 8.84450000  |
| H  | -1.58210000 | 10.16630000 | 7.93540000  |
| C  | -0.10000000 | 3.21040000  | 8.58170000  |
| H  | 0.96300000  | 3.07600000  | 8.81940000  |
| H  | -0.66140000 | 2.48250000  | 9.18020000  |
| C  | -0.34520000 | 2.96480000  | 7.08100000  |
| H  | -1.41020000 | 3.06810000  | 6.83890000  |
| H  | -0.06160000 | 1.94000000  | 6.81150000  |
| C  | -0.25450000 | 3.78350000  | 4.32860000  |
| H  | -0.00610000 | 2.73000000  | 4.14200000  |
| H  | -1.34450000 | 3.84660000  | 4.43260000  |
| C  | 0.24550000  | 4.63720000  | 3.15060000  |
| H  | 0.09260000  | 4.08760000  | 2.21450000  |
| H  | 1.32570000  | 4.80230000  | 3.23510000  |
| C  | 0.43310000  | 5.22350000  | 10.65310000 |
| C  | 0.97750000  | 6.49230000  | 10.91130000 |
| H  | 0.85090000  | 7.29790000  | 10.19090000 |
| C  | 1.68740000  | 6.73040000  | 12.09160000 |
| H  | 2.10530000  | 7.71660000  | 12.27980000 |
| C  | 1.86540000  | 5.70210000  | 13.01890000 |
| H  | 2.42370000  | 5.88510000  | 13.93420000 |
| C  | 1.32480000  | 4.43580000  | 12.77160000 |
| H  | 1.45860000  | 3.63430000  | 13.49460000 |



|   |             |            |             |
|---|-------------|------------|-------------|
| C | 0.60660000  | 4.19730000 | 11.59980000 |
| H | 0.17700000  | 3.21220000 | 11.43060000 |
| C | -2.27310000 | 4.86980000 | 9.71160000  |
| C | -3.20940000 | 3.98690000 | 9.14770000  |
| H | -2.91540000 | 3.28680000 | 8.37030000  |
| C | -4.53720000 | 3.98890000 | 9.58220000  |
| H | -5.24700000 | 3.29190000 | 9.14210000  |
| C | -4.95040000 | 4.87670000 | 10.57850000 |
| H | -5.98410000 | 4.87610000 | 10.91620000 |
| C | -4.02720000 | 5.76050000 | 11.14410000 |
| H | -4.33750000 | 6.44770000 | 11.92820000 |
| C | -2.69830000 | 5.75870000 | 10.71550000 |
| H | -1.98730000 | 6.43820000 | 11.18010000 |
| C | 2.24800000  | 3.66230000 | 5.79710000  |
| C | 3.20320000  | 4.60110000 | 5.36540000  |
| H | 2.91450000  | 5.63600000 | 5.19810000  |
| C | 4.53060000  | 4.22080000 | 5.15550000  |
| H | 5.25570000  | 4.95980000 | 4.82290000  |
| C | 4.92470000  | 2.90060000 | 5.38550000  |
| H | 5.96010000  | 2.60550000 | 5.23180000  |
| C | 3.98600000  | 1.96010000 | 5.81800000  |
| H | 4.28770000  | 0.93120000 | 6.00030000  |
| C | 2.65570000  | 2.33470000 | 6.01770000  |
| H | 1.94550000  | 1.58030000 | 6.34650000  |
| C | 0.25840000  | 7.05130000 | 1.53340000  |
| C | -0.46590000 | 7.91580000 | 0.69300000  |
| H | -1.52860000 | 8.07530000 | 0.85870000  |
| C | 0.16480000  | 8.56550000 | -0.36920000 |
| H | -0.41090000 | 9.22930000 | -1.01010000 |
| C | 1.52600000  | 8.36080000 | -0.61020000 |
| H | 2.01610000  | 8.86520000 | -1.43960000 |
| C | 2.25420000  | 7.50460000 | 0.21830000  |
| H | 3.31380000  | 7.33810000 | 0.03720000  |
| C | 1.62790000  | 6.85750000 | 1.28630000  |
| H | 2.22380000  | 6.20680000 | 1.92090000  |
| C | -2.24870000 | 5.86060000 | 2.30490000  |
| C | -3.42430000 | 6.41440000 | 2.83340000  |
| H | -3.36930000 | 7.08390000 | 3.68510000  |
| C | -4.66920000 | 6.10960000 | 2.27450000  |
| H | -5.57030000 | 6.55170000 | 2.69370000  |
| C | -4.75450000 | 5.24410000 | 1.18320000  |
| H | -5.72280000 | 5.00600000 | 0.74870000  |
| C | -3.58910000 | 4.69110000 | 0.64250000  |
| H | -3.64660000 | 4.02520000 | -0.21560000 |
| C | -2.34630000 | 5.00090000 | 1.19420000  |
| H | -1.45110000 | 4.58590000 | 0.73610000  |

**Species C<sub>ox</sub>**

HF energy= -3841.63588462

No Imaginary frequency

Zero-point correction = 0.692551 (Hartree/Particle)  
 Thermal correction to Energy = 0.742942  
 Thermal correction to Enthalpy = 0.743886  
 Thermal correction to Gibbs Free Energy = 0.604530  
 Sum of electronic and zero-point Energies = -3840.943334  
 Sum of electronic and thermal Energies = -3840.892943  
 Sum of electronic and thermal Enthalpies = -3840.891999  
 Sum of electronic and thermal Free Energies = -3841.031354

Coordinates: C<sub>ox</sub>

|    |             |             |             |
|----|-------------|-------------|-------------|
| Fe | 1.02610000  | 0.38390000  | 0.64630000  |
| Fe | -1.19020000 | -0.89360000 | 1.00720000  |
| P  | 2.74180000  | -0.66960000 | -0.58640000 |
| P  | 0.60310000  | 1.60730000  | -1.26870000 |
| P  | -2.87050000 | -0.13000000 | -0.38150000 |
| S  | 0.80320000  | -1.31770000 | 2.18650000  |
| S  | -0.86530000 | 1.32250000  | 1.66720000  |
| O  | 2.72150000  | 2.28190000  | 2.06470000  |
| O  | -0.23830000 | -2.38630000 | -1.35050000 |
| O  | -2.57600000 | -3.18570000 | 2.30630000  |
| C  | 2.09670000  | 1.52870000  | 1.45970000  |
| C  | -0.52140000 | -1.77230000 | -0.41350000 |
| C  | -2.06890000 | -2.30420000 | 1.77830000  |
| C  | 2.33480000  | -0.29690000 | -2.36470000 |
| H  | 3.16240000  | -0.54970000 | -3.03720000 |
| H  | 1.50090000  | -0.95820000 | -2.62720000 |
| C  | 1.91500000  | 1.17200000  | -2.52450000 |
| H  | 1.56400000  | 1.36420000  | -3.54640000 |
| H  | 2.76310000  | 1.84310000  | -2.34020000 |
| C  | -0.96830000 | 1.14030000  | -2.18150000 |
| H  | -0.99620000 | 1.77200000  | -3.07960000 |
| H  | -0.84860000 | 0.10770000  | -2.53180000 |
| C  | -2.29370000 | 1.32660000  | -1.40260000 |
| H  | -3.10030000 | 1.57710000  | -2.10250000 |
| H  | -2.22980000 | 2.17260000  | -0.70860000 |
| C  | 0.66340000  | -0.72640000 | 3.93550000  |
| H  | 0.64610000  | -1.63830000 | 4.54300000  |
| H  | 1.59820000  | -0.19790000 | 4.16270000  |
| C  | -0.59910000 | 1.46030000  | 3.49860000  |
| H  | 0.31360000  | 2.04760000  | 3.65550000  |
| H  | -1.44270000 | 2.06750000  | 3.84590000  |
| C  | 4.42910000  | 0.02820000  | -0.31170000 |
| C  | 4.92590000  | 0.09440000  | 1.00230000  |
| H  | 4.30860000  | -0.22890000 | 1.83720000  |
| C  | 6.21290000  | 0.57060000  | 1.25480000  |
| H  | 6.58110000  | 0.61030000  | 2.27740000  |
| C  | 7.02080000  | 1.00090000  | 0.19920000  |
| H  | 8.02160000  | 1.37820000  | 0.39590000  |
| C  | 6.53770000  | 0.94370000  | -1.10950000 |
| H  | 7.16120000  | 1.27290000  | -1.93770000 |

|   |             |             |             |
|---|-------------|-------------|-------------|
| C | 5.25350000  | 0.45570000  | -1.36540000 |
| H | 4.91280000  | 0.40770000  | -2.39590000 |
| C | 3.03320000  | -2.48960000 | -0.54430000 |
| C | 3.43330000  | -3.08750000 | 0.66420000  |
| H | 3.54630000  | -2.48780000 | 1.56210000  |
| C | 3.69020000  | -4.45720000 | 0.72770000  |
| H | 4.00040000  | -4.90200000 | 1.67050000  |
| C | 3.54720000  | -5.25260000 | -0.41220000 |
| H | 3.74610000  | -6.32060000 | -0.36170000 |
| C | 3.14950000  | -4.66950000 | -1.61660000 |
| H | 3.03860000  | -5.27960000 | -2.51020000 |
| C | 2.89430000  | -3.29760000 | -1.68500000 |
| H | 2.58900000  | -2.87440000 | -2.63680000 |
| C | 0.56350000  | 3.44510000  | -1.30820000 |
| C | 0.52530000  | 4.20140000  | -0.12650000 |
| H | 0.49650000  | 3.70360000  | 0.83680000  |
| C | 0.51010000  | 5.59820000  | -0.17980000 |
| H | 0.48080000  | 6.17050000  | 0.74460000  |
| C | 0.53290000  | 6.25470000  | -1.41110000 |
| H | 0.52290000  | 7.34160000  | -1.45100000 |
| C | 0.56970000  | 5.51160000  | -2.59540000 |
| H | 0.58970000  | 6.01710000  | -3.55820000 |
| C | 0.58370000  | 4.11810000  | -2.54530000 |
| H | 0.61730000  | 3.55990000  | -3.47890000 |
| C | -4.39510000 | 0.51560000  | 0.42020000  |
| C | -4.46920000 | 0.66190000  | 1.81380000  |
| H | -3.61790000 | 0.39160000  | 2.43230000  |
| C | -5.63130000 | 1.15710000  | 2.41160000  |
| H | -5.67960000 | 1.26150000  | 3.49320000  |
| C | -6.72690000 | 1.51310000  | 1.62270000  |
| H | -7.63140000 | 1.89800000  | 2.08820000  |
| C | -6.66370000 | 1.36590000  | 0.23330000  |
| H | -7.51810000 | 1.63390000  | -0.38410000 |
| C | -5.50790000 | 0.86500000  | -0.36570000 |
| H | -5.48120000 | 0.72980000  | -1.44500000 |
| C | -3.51970000 | -1.34150000 | -1.60940000 |
| C | -3.50550000 | -1.12340000 | -2.99640000 |
| H | -3.10170000 | -0.20510000 | -3.41330000 |
| C | -4.01780000 | -2.08630000 | -3.87190000 |
| H | -3.99920000 | -1.90100000 | -4.94360000 |
| C | -4.55330000 | -3.27500000 | -3.37470000 |
| H | -4.95190000 | -4.02210000 | -4.05710000 |
| C | -4.57840000 | -3.50010000 | -1.99490000 |
| H | -4.99930000 | -4.42080000 | -1.59750000 |
| C | -4.06350000 | -2.54360000 | -1.12050000 |
| H | -4.09700000 | -2.73270000 | -0.05020000 |
| C | -0.54260000 | 0.14590000  | 4.26820000  |
| H | -0.50230000 | 0.38250000  | 5.34280000  |
| H | -1.46940000 | -0.42110000 | 4.10760000  |

(vi) Table 1. Crystal data and structure refinement for str0432 (1).

|                                        |                                            |                            |
|----------------------------------------|--------------------------------------------|----------------------------|
| Identification code                    | str0432                                    |                            |
| Chemical formula                       | $C_{41}H_{41}Cl_2Fe_2O_3P_3S_2$            |                            |
| Formula weight                         | 921.37                                     |                            |
| Temperature                            | 150(2) K                                   |                            |
| Radiation, wavelength                  | MoK $\alpha$ , 0.71073 Å                   |                            |
| Crystal system, space group            | triclinic, P1bar                           |                            |
| Unit cell parameters                   | a = 9.4439(8) Å                            | $\alpha =$                 |
| 99.7830(10)°                           | b = 9.6258(9) Å                            | $\beta = 95.331(2)^\circ$  |
|                                        | c = 22.437(2) Å                            | $\gamma = 94.278(2)^\circ$ |
| Cell volume                            | 1992.8(3) Å <sup>3</sup>                   |                            |
| Z                                      | 2                                          |                            |
| Calculated density                     | 1.536 g/cm <sup>3</sup>                    |                            |
| Absorption coefficient $\mu$           | 1.127 mm <sup>-1</sup>                     |                            |
| F(000)                                 | 948                                        |                            |
| Crystal colour and size                | orange, 0.16 × 0.15 × 0.04 mm <sup>3</sup> |                            |
| Data collection method                 | Bruker SMART APEX diffractometer           |                            |
|                                        | $\omega$ rotation with narrow frames       |                            |
| $\theta$ range for data collection     | 1.85 to 28.29°                             |                            |
| Index ranges                           | h -12 to 12, k -12 to 12, l -29 to 28      |                            |
| Completeness to $\theta = 26.00^\circ$ | 98.4 %                                     |                            |
| Reflections collected                  | 17384                                      |                            |
| Independent reflections                | 9087 ( $R_{int} = 0.0228$ )                |                            |
| Reflections with $F^2 > 2\sigma$       | 7520                                       |                            |
| Absorption correction                  | semi-empirical from equivalents            |                            |
| Min. and max. transmission             | 0.8403 and 0.9563                          |                            |
| Structure solution                     | direct methods                             |                            |
| Refinement method                      | Full-matrix least-squares on $F^2$         |                            |
| Weighting parameters a, b              | 0.0503, 0.9529                             |                            |
| Data / restraints / parameters         | 9087 / 0 / 478                             |                            |
| Final R indices [ $F^2 > 2\sigma$ ]    | R1 = 0.0405, wR2 = 0.0950                  |                            |
| R indices (all data)                   | R1 = 0.0510, wR2 = 0.0998                  |                            |
| Goodness-of-fit on $F^2$               | 1.046                                      |                            |
| Largest and mean shift/su              | 0.001 and 0.000                            |                            |
| Largest diff. peak and hole            | 1.659 and -1.013 e Å <sup>-3</sup>         |                            |

Table 2. Atomic coordinates and equivalent isotropic displacement parameters ( $\text{\AA}^2$ ) for str0432.  $U_{\text{eq}}$  is defined as one third of the trace of the orthogonalized  $U^{\text{ij}}$  tensor.

|       | x           | y          | z            | $U_{\text{eq}}$ |
|-------|-------------|------------|--------------|-----------------|
| Fe(1) | 0.13516(3)  | 0.76806(3) | 0.319378(14) | 0.01580(9)      |
| Fe(2) | 0.08546(4)  | 0.89030(3) | 0.229439(14) | 0.01622(9)      |
| P(1)  | 0.08711(7)  | 0.68444(6) | 0.40143(3)   | 0.01742(13)     |
| P(2)  | 0.15237(6)  | 0.54995(6) | 0.27423(3)   | 0.01711(13)     |
| P(3)  | 0.03901(6)  | 0.73007(6) | 0.14534(3)   | 0.01703(13)     |
| S(1)  | -0.08223(6) | 0.75661(6) | 0.26652(3)   | 0.01738(12)     |
| S(2)  | 0.12665(7)  | 1.00513(6) | 0.32849(3)   | 0.02051(13)     |
| O(1)  | 0.43955(19) | 0.8259(2)  | 0.35641(9)   | 0.0306(4)       |
| O(2)  | 0.3926(2)   | 0.9232(2)  | 0.22207(9)   | 0.0348(5)       |
| O(3)  | -0.0007(2)  | 1.1229(2)  | 0.17081(9)   | 0.0398(5)       |
| C(1)  | 0.3189(3)   | 0.8001(2)  | 0.34176(11)  | 0.0204(5)       |
| C(2)  | 0.2709(3)   | 0.9086(3)  | 0.22498(11)  | 0.0223(5)       |
| C(3)  | 0.0273(3)   | 1.0285(3)  | 0.19386(11)  | 0.0230(5)       |
| C(4)  | -0.2142(3)  | 0.8682(3)  | 0.29942(12)  | 0.0251(5)       |
| C(5)  | -0.1709(3)  | 1.0259(3)  | 0.31130(12)  | 0.0272(6)       |
| C(6)  | -0.0390(3)  | 1.0665(3)  | 0.35590(11)  | 0.0266(6)       |
| C(7)  | 0.1040(3)   | 0.4903(2)  | 0.38567(11)  | 0.0217(5)       |
| C(8)  | 0.0600(3)   | 0.4335(2)  | 0.31817(11)  | 0.0204(5)       |
| C(9)  | 0.0676(3)   | 0.4818(3)  | 0.19608(11)  | 0.0206(5)       |
| C(10) | 0.1172(3)   | 0.5612(3)  | 0.14687(11)  | 0.0201(5)       |
| C(11) | 0.2066(2)   | 0.7478(3)  | 0.47113(10)  | 0.0188(5)       |
| C(12) | 0.2650(3)   | 0.8881(3)  | 0.48240(11)  | 0.0242(5)       |
| C(13) | 0.3562(3)   | 0.9422(3)  | 0.53420(11)  | 0.0254(5)       |
| C(14) | 0.3927(3)   | 0.8562(3)  | 0.57547(11)  | 0.0222(5)       |
| C(15) | 0.3343(3)   | 0.7169(3)  | 0.56554(11)  | 0.0248(5)       |
| C(16) | 0.2411(3)   | 0.6628(3)  | 0.51406(11)  | 0.0223(5)       |
| C(17) | -0.0896(3)  | 0.6876(2)  | 0.42977(11)  | 0.0195(5)       |
| C(18) | -0.2103(3)  | 0.6263(3)  | 0.39049(11)  | 0.0217(5)       |
| C(19) | -0.3446(3)  | 0.6236(3)  | 0.41050(12)  | 0.0246(5)       |
| C(20) | -0.3616(3)  | 0.6814(3)  | 0.46998(12)  | 0.0265(6)       |
| C(21) | -0.2434(3)  | 0.7427(3)  | 0.50926(12)  | 0.0272(6)       |
| C(22) | -0.1086(3)  | 0.7471(3)  | 0.48931(11)  | 0.0234(5)       |
| C(23) | 0.3291(3)   | 0.4837(3)  | 0.26948(10)  | 0.0204(5)       |
| C(24) | 0.4356(3)   | 0.5627(3)  | 0.24687(11)  | 0.0241(5)       |
| C(25) | 0.5676(3)   | 0.5126(3)  | 0.23905(12)  | 0.0298(6)       |
| C(26) | 0.5973(3)   | 0.3846(3)  | 0.25468(13)  | 0.0331(6)       |
| C(27) | 0.4947(3)   | 0.3053(3)  | 0.27820(13)  | 0.0334(6)       |
| C(28) | 0.3610(3)   | 0.3544(3)  | 0.28529(11)  | 0.0257(5)       |
| C(29) | 0.0984(3)   | 0.7788(3)  | 0.07578(10)  | 0.0200(5)       |
| C(30) | 0.0038(4)   | 0.7926(6)  | 0.02752(16)  | 0.0719(15)      |
| C(31) | 0.0516(4)   | 0.8337(7)  | -0.02416(19) | 0.0904(19)      |
| C(32) | 0.1923(3)   | 0.8623(4)  | -0.02822(13) | 0.0389(7)       |
| C(33) | 0.2881(3)   | 0.8487(4)  | 0.01921(13)  | 0.0395(7)       |
| C(34) | 0.2406(3)   | 0.8082(4)  | 0.07094(13)  | 0.0397(8)       |
| C(35) | -0.1510(3)  | 0.6762(3)  | 0.12117(10)  | 0.0196(5)       |
| C(36) | -0.2490(3)  | 0.7756(3)  | 0.13237(12)  | 0.0254(5)       |
| C(37) | -0.3931(3)  | 0.7406(3)  | 0.11272(13)  | 0.0312(6)       |
| C(38) | -0.4406(3)  | 0.6062(3)  | 0.08309(13)  | 0.0336(6)       |

|       |             |             |             |            |
|-------|-------------|-------------|-------------|------------|
| C(39) | -0.3451(3)  | 0.5065(3)   | 0.07225(13) | 0.0352(7)  |
| C(40) | -0.2004(3)  | 0.5408(3)   | 0.09038(12) | 0.0282(6)  |
| C(41) | 0.3661(4)   | 0.1912(5)   | 0.12401(17) | 0.0640(11) |
| Cl(1) | 0.53156(9)  | 0.12141(10) | 0.12418(4)  | 0.0513(2)  |
| Cl(2) | 0.32746(11) | 0.27003(12) | 0.06063(6)  | 0.0759(3)  |

Table 3. Bond lengths [Å] and angles [°] for str0432.

|                  |            |                  |            |
|------------------|------------|------------------|------------|
| Fe(1)–C(1)       | 1.750(3)   | Fe(1)–P(2)       | 2.1953(7)  |
| Fe(1)–P(1)       | 2.2016(7)  | Fe(1)–S(1)       | 2.2589(7)  |
| Fe(1)–S(2)       | 2.2644(7)  | Fe(1)–Fe(2)      | 2.5279(5)  |
| Fe(2)–C(3)       | 1.760(3)   | Fe(2)–C(2)       | 1.761(3)   |
| Fe(2)–P(3)       | 2.2109(7)  | Fe(2)–S(1)       | 2.2718(7)  |
| Fe(2)–S(2)       | 2.2918(7)  | P(1)–C(11)       | 1.827(2)   |
| P(1)–C(17)       | 1.841(3)   | P(1)–C(7)        | 1.863(2)   |
| P(2)–C(23)       | 1.836(2)   | P(2)–C(8)        | 1.838(2)   |
| P(2)–C(9)        | 1.848(2)   | P(3)–C(29)       | 1.828(2)   |
| P(3)–C(35)       | 1.835(2)   | P(3)–C(10)       | 1.839(2)   |
| S(1)–C(4)        | 1.831(2)   | S(2)–C(6)        | 1.835(3)   |
| O(1)–C(1)        | 1.153(3)   | O(2)–C(2)        | 1.156(3)   |
| O(3)–C(3)        | 1.155(3)   | C(4)–C(5)        | 1.515(4)   |
| C(5)–C(6)        | 1.506(4)   | C(7)–C(8)        | 1.528(3)   |
| C(9)–C(10)       | 1.534(3)   | C(11)–C(12)      | 1.392(3)   |
| C(11)–C(16)      | 1.397(3)   | C(12)–C(13)      | 1.380(3)   |
| C(13)–C(14)      | 1.380(4)   | C(14)–C(15)      | 1.385(4)   |
| C(15)–C(16)      | 1.385(3)   | C(17)–C(22)      | 1.394(3)   |
| C(17)–C(18)      | 1.400(3)   | C(18)–C(19)      | 1.384(4)   |
| C(19)–C(20)      | 1.385(4)   | C(20)–C(21)      | 1.383(4)   |
| C(21)–C(22)      | 1.388(4)   | C(23)–C(28)      | 1.397(3)   |
| C(23)–C(24)      | 1.400(4)   | C(24)–C(25)      | 1.385(4)   |
| C(25)–C(26)      | 1.378(4)   | C(26)–C(27)      | 1.386(4)   |
| C(27)–C(28)      | 1.394(4)   | C(29)–C(30)      | 1.369(4)   |
| C(29)–C(34)      | 1.370(4)   | C(30)–C(31)      | 1.390(4)   |
| C(31)–C(32)      | 1.351(5)   | C(32)–C(33)      | 1.361(4)   |
| C(33)–C(34)      | 1.387(4)   | C(35)–C(36)      | 1.388(4)   |
| C(35)–C(40)      | 1.392(4)   | C(36)–C(37)      | 1.390(4)   |
| C(37)–C(38)      | 1.371(4)   | C(38)–C(39)      | 1.373(4)   |
| C(39)–C(40)      | 1.388(4)   | C(41)–Cl(2)      | 1.744(4)   |
| C(41)–Cl(1)      | 1.747(4)   |                  |            |
|                  |            |                  |            |
| C(1)–Fe(1)–P(2)  | 93.26(8)   | C(1)–Fe(1)–P(1)  | 94.47(8)   |
| P(2)–Fe(1)–P(1)  | 88.37(3)   | C(1)–Fe(1)–S(1)  | 162.54(8)  |
| P(2)–Fe(1)–S(1)  | 88.13(2)   | P(1)–Fe(1)–S(1)  | 102.97(3)  |
| C(1)–Fe(1)–S(2)  | 87.99(8)   | P(2)–Fe(1)–S(2)  | 157.61(3)  |
| P(1)–Fe(1)–S(2)  | 113.84(3)  | S(1)–Fe(1)–S(2)  | 84.24(2)   |
| C(1)–Fe(1)–Fe(2) | 106.46(8)  | P(2)–Fe(1)–Fe(2) | 101.66(2)  |
| P(1)–Fe(1)–Fe(2) | 156.05(2)  | S(1)–Fe(1)–Fe(2) | 56.328(18) |
| S(2)–Fe(1)–Fe(2) | 56.820(18) | C(3)–Fe(2)–C(2)  | 101.97(12) |
| C(3)–Fe(2)–P(3)  | 93.47(8)   | C(2)–Fe(2)–P(3)  | 94.58(8)   |
| C(3)–Fe(2)–S(1)  | 117.39(9)  | C(2)–Fe(2)–S(1)  | 140.62(8)  |
| P(3)–Fe(2)–S(1)  | 84.90(2)   | C(3)–Fe(2)–S(2)  | 100.30(8)  |
| C(2)–Fe(2)–S(2)  | 88.60(8)   | P(3)–Fe(2)–S(2)  | 164.92(3)  |
| S(1)–Fe(2)–S(2)  | 83.33(2)   | C(3)–Fe(2)–Fe(1) | 154.24(8)  |
| C(2)–Fe(2)–Fe(1) | 88.00(8)   | P(3)–Fe(2)–Fe(1) | 109.52(2)  |
| S(1)–Fe(2)–Fe(1) | 55.846(18) | S(2)–Fe(2)–Fe(1) | 55.787(19) |
| C(11)–P(1)–C(17) | 101.93(11) | C(11)–P(1)–C(7)  | 103.86(11) |
| C(17)–P(1)–C(7)  | 100.77(11) | C(11)–P(1)–Fe(1) | 117.57(8)  |
| C(17)–P(1)–Fe(1) | 122.77(8)  | C(7)–P(1)–Fe(1)  | 107.32(8)  |
| C(23)–P(2)–C(8)  | 104.10(11) | C(23)–P(2)–C(9)  | 100.61(11) |
| C(8)–P(2)–C(9)   | 101.86(11) | C(23)–P(2)–Fe(1) | 119.72(8)  |
| C(8)–P(2)–Fe(1)  | 106.59(8)  | C(9)–P(2)–Fe(1)  | 121.47(8)  |

|                   |            |                   |            |
|-------------------|------------|-------------------|------------|
| C(29)–P(3)–C(35)  | 101.09(11) | C(29)–P(3)–C(10)  | 101.80(11) |
| C(35)–P(3)–C(10)  | 103.61(11) | C(29)–P(3)–Fe(2)  | 116.95(8)  |
| C(35)–P(3)–Fe(2)  | 115.42(8)  | C(10)–P(3)–Fe(2)  | 115.78(8)  |
| C(4)–S(1)–Fe(1)   | 118.18(9)  | C(4)–S(1)–Fe(2)   | 110.07(9)  |
| Fe(1)–S(1)–Fe(2)  | 67.83(2)   | C(6)–S(2)–Fe(1)   | 113.31(9)  |
| C(6)–S(2)–Fe(2)   | 110.68(9)  | Fe(1)–S(2)–Fe(2)  | 67.39(2)   |
| O(1)–C(1)–Fe(1)   | 177.7(2)   | O(2)–C(2)–Fe(2)   | 178.8(2)   |
| O(3)–C(3)–Fe(2)   | 175.1(2)   | C(5)–C(4)–S(1)    | 115.39(18) |
| C(6)–C(5)–C(4)    | 112.5(2)   | C(5)–C(6)–S(2)    | 115.23(17) |
| C(8)–C(7)–P(1)    | 109.18(16) | C(7)–C(8)–P(2)    | 108.04(16) |
| C(10)–C(9)–P(2)   | 115.67(17) | C(9)–C(10)–P(3)   | 114.16(16) |
| C(12)–C(11)–C(16) | 118.3(2)   | C(12)–C(11)–P(1)  | 118.42(18) |
| C(16)–C(11)–P(1)  | 123.24(18) | C(13)–C(12)–C(11) | 121.2(2)   |
| C(12)–C(13)–C(14) | 120.0(2)   | C(13)–C(14)–C(15) | 119.7(2)   |
| C(14)–C(15)–C(16) | 120.4(2)   | C(15)–C(16)–C(11) | 120.3(2)   |
| C(22)–C(17)–C(18) | 118.3(2)   | C(22)–C(17)–P(1)  | 122.67(19) |
| C(18)–C(17)–P(1)  | 119.04(18) | C(19)–C(18)–C(17) | 120.8(2)   |
| C(18)–C(19)–C(20) | 120.3(2)   | C(21)–C(20)–C(19) | 119.5(2)   |
| C(20)–C(21)–C(22) | 120.4(2)   | C(21)–C(22)–C(17) | 120.6(2)   |
| C(28)–C(23)–C(24) | 118.0(2)   | C(28)–C(23)–P(2)  | 122.9(2)   |
| C(24)–C(23)–P(2)  | 119.05(18) | C(25)–C(24)–C(23) | 121.0(2)   |
| C(26)–C(25)–C(24) | 120.3(3)   | C(25)–C(26)–C(27) | 120.0(3)   |
| C(26)–C(27)–C(28) | 119.9(3)   | C(27)–C(28)–C(23) | 120.8(3)   |
| C(30)–C(29)–C(34) | 117.2(2)   | C(30)–C(29)–P(3)  | 122.0(2)   |
| C(34)–C(29)–P(3)  | 120.77(19) | C(29)–C(30)–C(31) | 120.8(3)   |
| C(32)–C(31)–C(30) | 121.2(3)   | C(31)–C(32)–C(33) | 118.9(3)   |
| C(32)–C(33)–C(34) | 120.0(3)   | C(29)–C(34)–C(33) | 121.8(3)   |
| C(36)–C(35)–C(40) | 118.6(2)   | C(36)–C(35)–P(3)  | 118.75(19) |
| C(40)–C(35)–P(3)  | 122.6(2)   | C(35)–C(36)–C(37) | 120.5(2)   |
| C(38)–C(37)–C(36) | 120.2(3)   | C(37)–C(38)–C(39) | 119.9(3)   |
| C(38)–C(39)–C(40) | 120.6(3)   | C(39)–C(40)–C(35) | 120.2(3)   |
| Cl(2)–C(41)–Cl(1) | 112.1(2)   |                   |            |



Table 4. Anisotropic displacement parameters ( $\text{\AA}^2$ ) for str0432. The anisotropic displacement factor exponent takes the form:  $-2\pi^2[h^2a^*2U^{11} + \dots + 2hka^*b^*U^{12}]$

|              | $U^{11}$    | $U^{22}$    | $U^{33}$    | $U^{23}$    | $U^{13}$     | $U^{12}$    |
|--------------|-------------|-------------|-------------|-------------|--------------|-------------|
| Fe(1)        | 0.01918(18) | 0.01477(16) | 0.01276(16) | 0.00378(12) | -0.00172(12) |             |
| -0.00167(12) |             |             |             |             |              |             |
| Fe(2)        | 0.01958(18) | 0.01635(17) | 0.01244(16) | 0.00408(13) | -0.00026(12) |             |
| -0.00116(13) |             |             |             |             |              |             |
| P(1)         | 0.0217(3)   | 0.0163(3)   | 0.0136(3)   | 0.0043(2)   | -0.0016(2)   | -0.0021(2)  |
| P(2)         | 0.0202(3)   | 0.0156(3)   | 0.0150(3)   | 0.0038(2)   | -0.0012(2)   | -0.0003(2)  |
| P(3)         | 0.0177(3)   | 0.0197(3)   | 0.0135(3)   | 0.0036(2)   | -0.0003(2)   | 0.0007(2)   |
| S(1)         | 0.0189(3)   | 0.0181(3)   | 0.0150(3)   | 0.0044(2)   | -0.0001(2)   | -0.0003(2)  |
| S(2)         | 0.0294(3)   | 0.0159(3)   | 0.0150(3)   | 0.0027(2)   | -0.0005(2)   | -0.0020(2)  |
| O(1)         | 0.0238(10)  | 0.0319(10)  | 0.0325(10)  | 0.0022(8)   | -0.0053(8)   | -0.0024(8)  |
| O(2)         | 0.0251(11)  | 0.0463(12)  | 0.0343(11)  | 0.0128(9)   | 0.0051(8)    | -0.0040(9)  |
| O(3)         | 0.0633(15)  | 0.0262(10)  | 0.0316(11)  | 0.0150(9)   | -0.0034(10)  | 0.0026(10)  |
| C(1)         | 0.0270(13)  | 0.0163(11)  | 0.0175(11)  | 0.0039(9)   | 0.0004(10)   | 0.0003(9)   |
| C(2)         | 0.0290(14)  | 0.0213(12)  | 0.0152(11)  | 0.0026(9)   | 0.0000(10)   | -0.0026(10) |
| C(3)         | 0.0302(14)  | 0.0206(12)  | 0.0170(11)  | 0.0028(10)  | -0.0002(10)  | -0.0008(10) |
| C(4)         | 0.0216(13)  | 0.0293(14)  | 0.0269(13)  | 0.0076(11)  | 0.0068(10)   | 0.0072(10)  |
| C(5)         | 0.0343(15)  | 0.0268(14)  | 0.0243(13)  | 0.0072(11)  | 0.0104(11)   | 0.0114(11)  |
| C(6)         | 0.0429(16)  | 0.0202(12)  | 0.0179(12)  | 0.0014(10)  | 0.0103(11)   | 0.0058(11)  |
| C(7)         | 0.0271(13)  | 0.0185(12)  | 0.0203(12)  | 0.0074(10)  | 0.0013(10)   | -0.0001(10) |
| C(8)         | 0.0250(13)  | 0.0165(11)  | 0.0190(11)  | 0.0032(9)   | 0.0016(9)    | -0.0017(9)  |
| C(9)         | 0.0241(13)  | 0.0173(12)  | 0.0182(11)  | 0.0009(9)   | -0.0035(9)   | -0.0001(9)  |
| C(10)        | 0.0212(12)  | 0.0232(12)  | 0.0157(11)  | 0.0029(9)   | -0.0005(9)   | 0.0038(10)  |
| C(11)        | 0.0194(12)  | 0.0215(12)  | 0.0147(11)  | 0.0039(9)   | -0.0007(9)   | -0.0010(9)  |
| C(12)        | 0.0329(14)  | 0.0211(12)  | 0.0181(12)  | 0.0057(10)  | -0.0020(10)  | -0.0012(10) |
| C(13)        | 0.0321(14)  | 0.0205(13)  | 0.0211(12)  | 0.0011(10)  | -0.0003(10)  | -0.0042(10) |
| C(14)        | 0.0216(12)  | 0.0282(13)  | 0.0147(11)  | 0.0016(10)  | -0.0015(9)   | -0.0023(10) |
| C(15)        | 0.0297(14)  | 0.0268(13)  | 0.0186(12)  | 0.0086(10)  | -0.0032(10)  | 0.0034(11)  |
| C(16)        | 0.0275(13)  | 0.0200(12)  | 0.0195(12)  | 0.0065(10)  | 0.0001(10)   | -0.0016(10) |
| C(17)        | 0.0238(12)  | 0.0172(11)  | 0.0186(11)  | 0.0080(9)   | 0.0006(9)    | 0.0007(9)   |
| C(18)        | 0.0260(13)  | 0.0223(12)  | 0.0171(11)  | 0.0069(10)  | 0.0001(10)   | -0.0016(10) |
| C(19)        | 0.0234(13)  | 0.0227(13)  | 0.0277(13)  | 0.0081(11)  | -0.0014(10)  | -0.0005(10) |
| C(20)        | 0.0253(13)  | 0.0253(13)  | 0.0322(14)  | 0.0100(11)  | 0.0076(11)   | 0.0073(10)  |
| C(21)        | 0.0350(15)  | 0.0243(13)  | 0.0235(13)  | 0.0043(10)  | 0.0056(11)   | 0.0075(11)  |
| C(22)        | 0.0300(14)  | 0.0197(12)  | 0.0193(12)  | 0.0023(10)  | -0.0012(10)  | 0.0024(10)  |
| C(23)        | 0.0231(12)  | 0.0214(12)  | 0.0154(11)  | 0.0015(9)   | -0.0025(9)   | 0.0028(10)  |
| C(24)        | 0.0252(13)  | 0.0242(13)  | 0.0211(12)  | 0.0029(10)  | -0.0036(10)  | 0.0013(10)  |
| C(25)        | 0.0232(13)  | 0.0358(15)  | 0.0271(14)  | -0.0004(12) | -0.0004(11)  | -0.0018(11) |
| C(26)        | 0.0283(15)  | 0.0365(16)  | 0.0306(15)  | -0.0036(12) | -0.0052(11)  | 0.0094(12)  |
| C(27)        | 0.0378(16)  | 0.0302(15)  | 0.0315(15)  | 0.0048(12)  | -0.0059(12)  | 0.0123(12)  |
| C(28)        | 0.0302(14)  | 0.0241(13)  | 0.0229(13)  | 0.0056(10)  | 0.0000(10)   | 0.0033(11)  |
| C(29)        | 0.0230(12)  | 0.0218(12)  | 0.0157(11)  | 0.0039(9)   | 0.0034(9)    | 0.0028(10)  |
| C(30)        | 0.0240(17)  | 0.162(5)    | 0.045(2)    | 0.068(3)    | 0.0006(14)   | 0.000(2)    |
| C(31)        | 0.038(2)    | 0.202(6)    | 0.055(2)    | 0.089(3)    | 0.0029(18)   | 0.013(3)    |
| C(32)        | 0.0383(17)  | 0.057(2)    | 0.0284(15)  | 0.0212(14)  | 0.0129(13)   | 0.0085(15)  |
| C(33)        | 0.0270(15)  | 0.065(2)    | 0.0263(14)  | 0.0104(14)  | 0.0076(12)   | -0.0067(14) |
| C(34)        | 0.0226(14)  | 0.076(2)    | 0.0210(14)  | 0.0140(14)  | -0.0016(11)  | -0.0015(14) |
| C(35)        | 0.0200(12)  | 0.0253(13)  | 0.0133(11)  | 0.0052(9)   | 0.0002(9)    | -0.0017(9)  |
| C(36)        | 0.0250(13)  | 0.0239(13)  | 0.0252(13)  | 0.0031(10)  | -0.0037(10)  | 0.0003(10)  |
| C(37)        | 0.0231(14)  | 0.0373(16)  | 0.0330(15)  | 0.0058(12)  | -0.0012(11)  | 0.0074(11)  |
| C(38)        | 0.0222(14)  | 0.0424(17)  | 0.0337(15)  | 0.0068(13)  | -0.0052(11)  | -0.0036(12) |
| C(39)        | 0.0316(15)  | 0.0313(15)  | 0.0367(16)  | -0.0005(13) | -0.0082(12)  | -0.0069(12) |
| C(40)        | 0.0272(14)  | 0.0266(14)  | 0.0279(14)  | 0.0004(11)  | -0.0026(11)  | 0.0004(11)  |
| C(41)        | 0.045(2)    | 0.107(4)    | 0.041(2)    | 0.009(2)    | 0.0106(16)   | 0.016(2)    |
| Cl(1)        | 0.0481(5)   | 0.0584(5)   | 0.0507(5)   | 0.0115(4)   | 0.0149(4)    | 0.0103(4)   |
| Cl(2)        | 0.0570(6)   | 0.0723(7)   | 0.0973(9)   | 0.0368(6)   | -0.0205(6)   | -0.0151(5)  |

Table 5. Hydrogen coordinates and isotropic displacement parameters ( $\text{\AA}^2$ ) for str0432.

|        | x       | y      | z       | U     |
|--------|---------|--------|---------|-------|
| H(4A)  | -0.3039 | 0.8493 | 0.2716  | 0.030 |
| H(4B)  | -0.2349 | 0.8397 | 0.3383  | 0.030 |
| H(5A)  | -0.1530 | 1.0561 | 0.2724  | 0.033 |
| H(5B)  | -0.2505 | 1.0768 | 0.3273  | 0.033 |
| H(6A)  | -0.0547 | 1.0280 | 0.3932  | 0.032 |
| H(6B)  | -0.0263 | 1.1710 | 0.3673  | 0.032 |
| H(7A)  | 0.2039  | 0.4717 | 0.3966  | 0.026 |
| H(7B)  | 0.0419  | 0.4419 | 0.4105  | 0.026 |
| H(8A)  | -0.0447 | 0.4323 | 0.3090  | 0.024 |
| H(8B)  | 0.0868  | 0.3356 | 0.3074  | 0.024 |
| H(9A)  | 0.0862  | 0.3813 | 0.1850  | 0.025 |
| H(9B)  | -0.0369 | 0.4848 | 0.1960  | 0.025 |
| H(10A) | 0.0925  | 0.4994 | 0.1067  | 0.024 |
| H(10B) | 0.2225  | 0.5799 | 0.1535  | 0.024 |
| H(12A) | 0.2416  | 0.9476 | 0.4539  | 0.029 |
| H(13A) | 0.3937  | 1.0386 | 0.5415  | 0.030 |
| H(14A) | 0.4577  | 0.8925 | 0.6105  | 0.027 |
| H(15A) | 0.3584  | 0.6580 | 0.5942  | 0.030 |
| H(16A) | 0.2005  | 0.5675 | 0.5079  | 0.027 |
| H(18A) | -0.1998 | 0.5861 | 0.3496  | 0.026 |
| H(19A) | -0.4255 | 0.5819 | 0.3833  | 0.030 |
| H(20A) | -0.4538 | 0.6790 | 0.4837  | 0.032 |
| H(21A) | -0.2545 | 0.7820 | 0.5502  | 0.033 |
| H(22A) | -0.0284 | 0.7911 | 0.5165  | 0.028 |
| H(24A) | 0.4171  | 0.6520 | 0.2367  | 0.029 |
| H(25A) | 0.6380  | 0.5667 | 0.2228  | 0.036 |
| H(26A) | 0.6881  | 0.3507 | 0.2493  | 0.040 |
| H(27A) | 0.5154  | 0.2176 | 0.2895  | 0.040 |
| H(28A) | 0.2907  | 0.2992 | 0.3011  | 0.031 |
| H(30A) | -0.0957 | 0.7739 | 0.0294  | 0.086 |
| H(31A) | -0.0159 | 0.8419 | -0.0572 | 0.108 |
| H(32A) | 0.2239  | 0.8913 | -0.0636 | 0.047 |
| H(33A) | 0.3875  | 0.8670 | 0.0169  | 0.047 |
| H(34A) | 0.3086  | 0.8007 | 0.1039  | 0.048 |
| H(36A) | -0.2172 | 0.8682 | 0.1536  | 0.030 |
| H(37A) | -0.4590 | 0.8099 | 0.1198  | 0.037 |
| H(38A) | -0.5393 | 0.5822 | 0.0701  | 0.040 |
| H(39A) | -0.3784 | 0.4132 | 0.0522  | 0.042 |
| H(40A) | -0.1349 | 0.4717 | 0.0818  | 0.034 |
| H(41A) | 0.2905  | 0.1144 | 0.1244  | 0.077 |
| H(41B) | 0.3658  | 0.2624 | 0.1614  | 0.077 |

Table 6. Torsion angles [°] for str0432.

|                        |             |                        |             |
|------------------------|-------------|------------------------|-------------|
| C(1)–Fe(1)–Fe(2)–C(3)  | –100.5(2)   | P(2)–Fe(1)–Fe(2)–C(3)  | 162.5(2)    |
| P(1)–Fe(1)–Fe(2)–C(3)  | 49.4(2)     | S(1)–Fe(1)–Fe(2)–C(3)  | 82.7(2)     |
| S(2)–Fe(1)–Fe(2)–C(3)  | –24.2(2)    | C(1)–Fe(1)–Fe(2)–C(2)  | 13.37(11)   |
| P(2)–Fe(1)–Fe(2)–C(2)  | –83.61(8)   | P(1)–Fe(1)–Fe(2)–C(2)  | 163.26(10)  |
| S(1)–Fe(1)–Fe(2)–C(2)  | –163.39(8)  | S(2)–Fe(1)–Fe(2)–C(2)  | 89.66(8)    |
| C(1)–Fe(1)–Fe(2)–P(3)  | 107.52(8)   | P(2)–Fe(1)–Fe(2)–P(3)  | 10.55(3)    |
| P(1)–Fe(1)–Fe(2)–P(3)  | –102.58(6)  | S(1)–Fe(1)–Fe(2)–P(3)  | –69.23(3)   |
| S(2)–Fe(1)–Fe(2)–P(3)  | –176.18(3)  | C(1)–Fe(1)–Fe(2)–S(1)  | 176.76(8)   |
| P(2)–Fe(1)–Fe(2)–S(1)  | 79.78(3)    | P(1)–Fe(1)–Fe(2)–S(1)  | –33.35(6)   |
| S(2)–Fe(1)–Fe(2)–S(1)  | –106.94(3)  | C(1)–Fe(1)–Fe(2)–S(2)  | –76.30(8)   |
| P(2)–Fe(1)–Fe(2)–S(2)  | –173.27(3)  | P(1)–Fe(1)–Fe(2)–S(2)  | 73.59(6)    |
| S(1)–Fe(1)–Fe(2)–S(2)  | 106.94(3)   | C(1)–Fe(1)–P(1)–C(11)  | 27.65(12)   |
| P(2)–Fe(1)–P(1)–C(11)  | 120.79(9)   | S(1)–Fe(1)–P(1)–C(11)  | –151.50(9)  |
| S(2)–Fe(1)–P(1)–C(11)  | –62.12(10)  | Fe(2)–Fe(1)–P(1)–C(11) | –123.50(10) |
| C(1)–Fe(1)–P(1)–C(17)  | 155.49(12)  | P(2)–Fe(1)–P(1)–C(17)  | –111.37(10) |
| S(1)–Fe(1)–P(1)–C(17)  | –23.66(10)  | S(2)–Fe(1)–P(1)–C(17)  | 65.71(10)   |
| Fe(2)–Fe(1)–P(1)–C(17) | 4.34(12)    | C(1)–Fe(1)–P(1)–C(7)   | –88.82(12)  |
| P(2)–Fe(1)–P(1)–C(7)   | 4.32(9)     | S(1)–Fe(1)–P(1)–C(7)   | 92.03(9)    |
| S(2)–Fe(1)–P(1)–C(7)   | –178.59(9)  | Fe(2)–Fe(1)–P(1)–C(7)  | 120.03(10)  |
| C(1)–Fe(1)–P(2)–C(23)  | –4.19(12)   | P(1)–Fe(1)–P(2)–C(23)  | –98.57(9)   |
| S(1)–Fe(1)–P(2)–C(23)  | 158.39(9)   | S(2)–Fe(1)–P(2)–C(23)  | 88.44(11)   |
| Fe(2)–Fe(1)–P(2)–C(23) | 103.36(9)   | C(1)–Fe(1)–P(2)–C(8)   | 113.37(12)  |
| P(1)–Fe(1)–P(2)–C(8)   | 18.99(9)    | S(1)–Fe(1)–P(2)–C(8)   | –84.05(9)   |
| S(2)–Fe(1)–P(2)–C(8)   | –154.00(10) | Fe(2)–Fe(1)–P(2)–C(8)  | –139.08(8)  |
| C(1)–Fe(1)–P(2)–C(9)   | –130.92(12) | P(1)–Fe(1)–P(2)–C(9)   | 134.70(10)  |
| S(1)–Fe(1)–P(2)–C(9)   | 31.66(10)   | S(2)–Fe(1)–P(2)–C(9)   | –38.29(13)  |
| Fe(2)–Fe(1)–P(2)–C(9)  | –23.37(10)  | C(3)–Fe(2)–P(3)–C(29)  | 45.92(12)   |
| C(2)–Fe(2)–P(3)–C(29)  | –56.39(12)  | S(1)–Fe(2)–P(3)–C(29)  | 163.13(9)   |
| S(2)–Fe(2)–P(3)–C(29)  | –158.12(12) | Fe(1)–Fe(2)–P(3)–C(29) | –145.89(9)  |
| C(3)–Fe(2)–P(3)–C(35)  | –72.79(12)  | C(2)–Fe(2)–P(3)–C(35)  | –175.11(12) |
| S(1)–Fe(2)–P(3)–C(35)  | 44.42(9)    | S(2)–Fe(2)–P(3)–C(35)  | 83.16(14)   |
| Fe(1)–Fe(2)–P(3)–C(35) | 95.39(9)    | C(3)–Fe(2)–P(3)–C(10)  | 165.94(12)  |
| C(2)–Fe(2)–P(3)–C(10)  | 63.63(12)   | S(1)–Fe(2)–P(3)–C(10)  | –76.85(9)   |
| S(2)–Fe(2)–P(3)–C(10)  | –38.10(15)  | Fe(1)–Fe(2)–P(3)–C(10) | –25.87(9)   |
| C(1)–Fe(1)–S(1)–C(4)   | –112.1(3)   | P(2)–Fe(1)–S(1)–C(4)   | 152.99(10)  |
| P(1)–Fe(1)–S(1)–C(4)   | 65.10(10)   | S(2)–Fe(1)–S(1)–C(4)   | –48.08(10)  |
| Fe(2)–Fe(1)–S(1)–C(4)  | –101.66(10) | C(1)–Fe(1)–S(1)–Fe(2)  | –10.4(3)    |
| P(2)–Fe(1)–S(1)–Fe(2)  | –105.34(2)  | P(1)–Fe(1)–S(1)–Fe(2)  | 166.76(2)   |
| S(2)–Fe(1)–S(1)–Fe(2)  | 53.58(2)    | C(3)–Fe(2)–S(1)–C(4)   | –37.76(13)  |
| C(2)–Fe(2)–S(1)–C(4)   | 139.96(15)  | P(3)–Fe(2)–S(1)–C(4)   | –129.03(9)  |
| S(2)–Fe(2)–S(1)–C(4)   | 60.41(9)    | Fe(1)–Fe(2)–S(1)–C(4)  | 113.20(9)   |
| C(3)–Fe(2)–S(1)–Fe(1)  | –150.96(9)  | C(2)–Fe(2)–S(1)–Fe(1)  | 26.76(13)   |
| P(3)–Fe(2)–S(1)–Fe(1)  | 117.77(2)   | S(2)–Fe(2)–S(1)–Fe(1)  | –52.79(2)   |
| C(1)–Fe(1)–S(2)–C(6)   | –145.08(12) | P(2)–Fe(1)–S(2)–C(6)   | 121.25(11)  |
| P(1)–Fe(1)–S(2)–C(6)   | –51.09(10)  | S(1)–Fe(1)–S(2)–C(6)   | 50.57(9)    |
| Fe(2)–Fe(1)–S(2)–C(6)  | 103.72(9)   | C(1)–Fe(1)–S(2)–Fe(2)  | 111.20(8)   |
| P(2)–Fe(1)–S(2)–Fe(2)  | 17.53(8)    | P(1)–Fe(1)–S(2)–Fe(2)  | –154.80(3)  |
| S(1)–Fe(1)–S(2)–Fe(2)  | –53.14(2)   | C(3)–Fe(2)–S(2)–C(6)   | 62.04(13)   |
| C(2)–Fe(2)–S(2)–C(6)   | 163.94(12)  | P(3)–Fe(2)–S(2)–C(6)   | –93.55(14)  |
| S(1)–Fe(2)–S(2)–C(6)   | –54.67(9)   | Fe(1)–Fe(2)–S(2)–C(6)  | –107.52(9)  |

|                         |             |                         |             |
|-------------------------|-------------|-------------------------|-------------|
| C(3)–Fe(2)–S(2)–Fe(1)   | 169.56(9)   | C(2)–Fe(2)–S(2)–Fe(1)   | –88.54(8)   |
| P(3)–Fe(2)–S(2)–Fe(1)   | 13.97(11)   | S(1)–Fe(2)–S(2)–Fe(1)   | 52.85(2)    |
| P(2)–Fe(1)–C(1)–O(1)    | 151(6)      | P(1)–Fe(1)–C(1)–O(1)    | –120(6)     |
| S(1)–Fe(1)–C(1)–O(1)    | 57(6)       | S(2)–Fe(1)–C(1)–O(1)    | –7(6)       |
| Fe(2)–Fe(1)–C(1)–O(1)   | 48(6)       | C(3)–Fe(2)–C(2)–O(2)    | 29(10)      |
| P(3)–Fe(2)–C(2)–O(2)    | 123(10)     | S(1)–Fe(2)–C(2)–O(2)    | –149(10)    |
| S(2)–Fe(2)–C(2)–O(2)    | –71(10)     | Fe(1)–Fe(2)–C(2)–O(2)   | –127(10)    |
| C(2)–Fe(2)–C(3)–O(3)    | –13(3)      | P(3)–Fe(2)–C(3)–O(3)    | –108(3)     |
| S(1)–Fe(2)–C(3)–O(3)    | 166(3)      | S(2)–Fe(2)–C(3)–O(3)    | 78(3)       |
| Fe(1)–Fe(2)–C(3)–O(3)   | 98(3)       | Fe(1)–S(1)–C(4)–C(5)    | 59.7(2)     |
| Fe(2)–S(1)–C(4)–C(5)    | –15.2(2)    | S(1)–C(4)–C(5)–C(6)     | –61.2(3)    |
| C(4)–C(5)–C(6)–S(2)     | 68.2(3)     | Fe(1)–S(2)–C(6)–C(5)    | –70.5(2)    |
| Fe(2)–S(2)–C(6)–C(5)    | 2.9(2)      | C(11)–P(1)–C(7)–C(8)    | –157.57(17) |
| C(17)–P(1)–C(7)–C(8)    | 97.14(18)   | Fe(1)–P(1)–C(7)–C(8)    | –32.39(18)  |
| P(1)–C(7)–C(8)–P(2)     | 48.2(2)     | C(23)–P(2)–C(8)–C(7)    | 83.58(18)   |
| C(9)–P(2)–C(8)–C(7)     | –172.14(17) | Fe(1)–P(2)–C(8)–C(7)    | –43.88(18)  |
| C(23)–P(2)–C(9)–C(10)   | –75.29(19)  | C(8)–P(2)–C(9)–C(10)    | 177.70(18)  |
| Fe(1)–P(2)–C(9)–C(10)   | 59.6(2)     | P(2)–C(9)–C(10)–P(3)    | –77.6(2)    |
| C(29)–P(3)–C(10)–C(9)   | –171.62(17) | C(35)–P(3)–C(10)–C(9)   | –66.98(19)  |
| Fe(2)–P(3)–C(10)–C(9)   | 60.42(19)   | C(17)–P(1)–C(11)–C(12)  | –101.5(2)   |
| C(7)–P(1)–C(11)–C(12)   | 154.1(2)    | Fe(1)–P(1)–C(11)–C(12)  | 35.8(2)     |
| C(17)–P(1)–C(11)–C(16)  | 77.8(2)     | C(7)–P(1)–C(11)–C(16)   | –26.6(2)    |
| Fe(1)–P(1)–C(11)–C(16)  | –144.97(19) | C(16)–C(11)–C(12)–C(13) | 0.8(4)      |
| P(1)–C(11)–C(12)–C(13)  | –179.9(2)   | C(11)–C(12)–C(13)–C(14) | 1.0(4)      |
| C(12)–C(13)–C(14)–C(15) | –1.9(4)     | C(13)–C(14)–C(15)–C(16) | 0.9(4)      |
| C(14)–C(15)–C(16)–C(11) | 0.9(4)      | C(12)–C(11)–C(16)–C(15) | –1.8(4)     |
| P(1)–C(11)–C(16)–C(15)  | 179.0(2)    | C(11)–P(1)–C(17)–C(22)  | 8.2(2)      |
| C(7)–P(1)–C(17)–C(22)   | 115.0(2)    | Fe(1)–P(1)–C(17)–C(22)  | –126.13(18) |
| C(11)–P(1)–C(17)–C(18)  | –170.94(19) | C(7)–P(1)–C(17)–C(18)   | –64.1(2)    |
| Fe(1)–P(1)–C(17)–C(18)  | 54.7(2)     | C(22)–C(17)–C(18)–C(19) | –0.7(4)     |
| P(1)–C(17)–C(18)–C(19)  | 178.49(18)  | C(17)–C(18)–C(19)–C(20) | –0.2(4)     |
| C(18)–C(19)–C(20)–C(21) | 0.4(4)      | C(19)–C(20)–C(21)–C(22) | 0.3(4)      |
| C(20)–C(21)–C(22)–C(17) | –1.2(4)     | C(18)–C(17)–C(22)–C(21) | 1.4(4)      |
| P(1)–C(17)–C(22)–C(21)  | –177.76(19) | C(8)–P(2)–C(23)–C(28)   | 12.4(2)     |
| C(9)–P(2)–C(23)–C(28)   | –92.8(2)    | Fe(1)–P(2)–C(23)–C(28)  | 131.25(19)  |
| C(8)–P(2)–C(23)–C(24)   | –170.14(19) | C(9)–P(2)–C(23)–C(24)   | 84.6(2)     |
| Fe(1)–P(2)–C(23)–C(24)  | –51.3(2)    | C(28)–C(23)–C(24)–C(25) | 1.5(4)      |
| P(2)–C(23)–C(24)–C(25)  | –176.07(19) | C(23)–C(24)–C(25)–C(26) | –1.3(4)     |
| C(24)–C(25)–C(26)–C(27) | 0.2(4)      | C(25)–C(26)–C(27)–C(28) | 0.8(4)      |
| C(26)–C(27)–C(28)–C(23) | –0.6(4)     | C(24)–C(23)–C(28)–C(27) | –0.5(4)     |
| P(2)–C(23)–C(28)–C(27)  | 176.9(2)    | C(35)–P(3)–C(29)–C(30)  | 11.3(3)     |
| C(10)–P(3)–C(29)–C(30)  | 117.9(3)    | Fe(2)–P(3)–C(29)–C(30)  | –114.9(3)   |
| C(35)–P(3)–C(29)–C(34)  | –171.2(2)   | C(10)–P(3)–C(29)–C(34)  | –64.6(3)    |
| Fe(2)–P(3)–C(29)–C(34)  | 62.6(3)     | C(34)–C(29)–C(30)–C(31) | 0.5(7)      |
| P(3)–C(29)–C(30)–C(31)  | 178.1(4)    | C(29)–C(30)–C(31)–C(32) | –0.5(9)     |
| C(30)–C(31)–C(32)–C(33) | 0.7(8)      | C(31)–C(32)–C(33)–C(34) | –0.9(6)     |
| C(30)–C(29)–C(34)–C(33) | –0.8(5)     | P(3)–C(29)–C(34)–C(33)  | –178.4(3)   |
| C(32)–C(33)–C(34)–C(29) | 1.0(5)      | C(29)–P(3)–C(35)–C(36)  | –93.9(2)    |
| C(10)–P(3)–C(35)–C(36)  | 160.90(19)  | Fe(2)–P(3)–C(35)–C(36)  | 33.3(2)     |
| C(29)–P(3)–C(35)–C(40)  | 84.1(2)     | C(10)–P(3)–C(35)–C(40)  | –21.1(2)    |
| Fe(2)–P(3)–C(35)–C(40)  | –148.74(19) | C(40)–C(35)–C(36)–C(37) | –0.6(4)     |
| P(3)–C(35)–C(36)–C(37)  | 177.5(2)    | C(35)–C(36)–C(37)–C(38) | 1.4(4)      |

|                         |           |                         |         |
|-------------------------|-----------|-------------------------|---------|
| C(36)–C(37)–C(38)–C(39) | –0.7(4)   | C(37)–C(38)–C(39)–C(40) | –0.8(5) |
| C(38)–C(39)–C(40)–C(35) | 1.6(4)    | C(36)–C(35)–C(40)–C(39) | –0.9(4) |
| P(3)–C(35)–C(40)–C(39)  | –178.9(2) |                         |         |

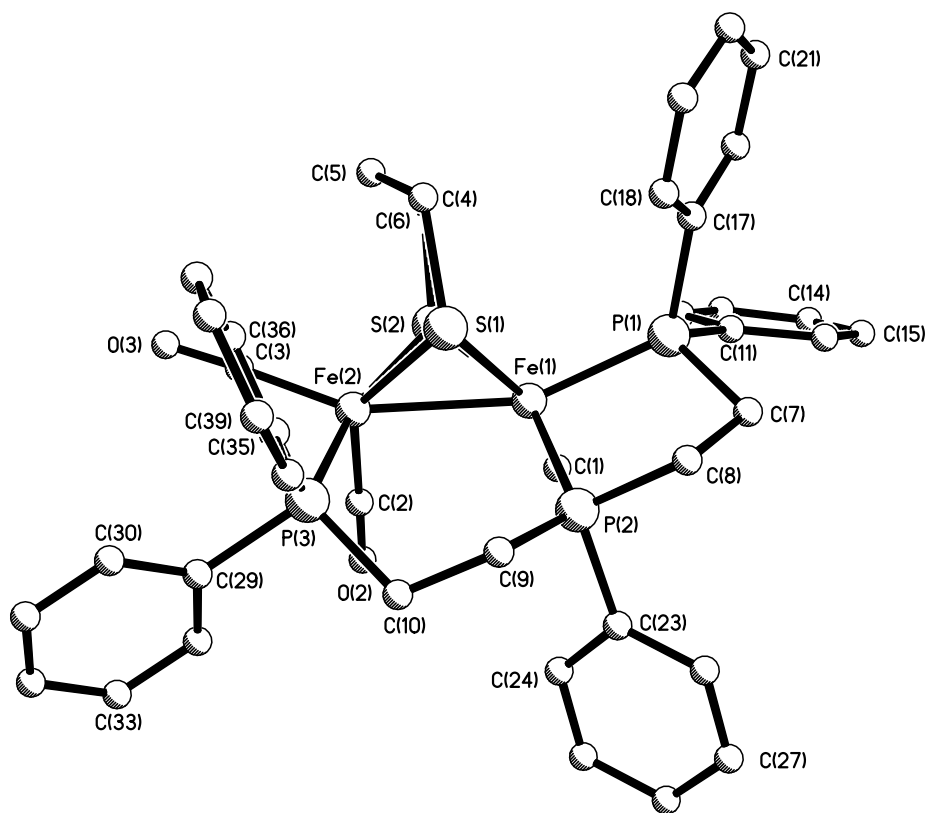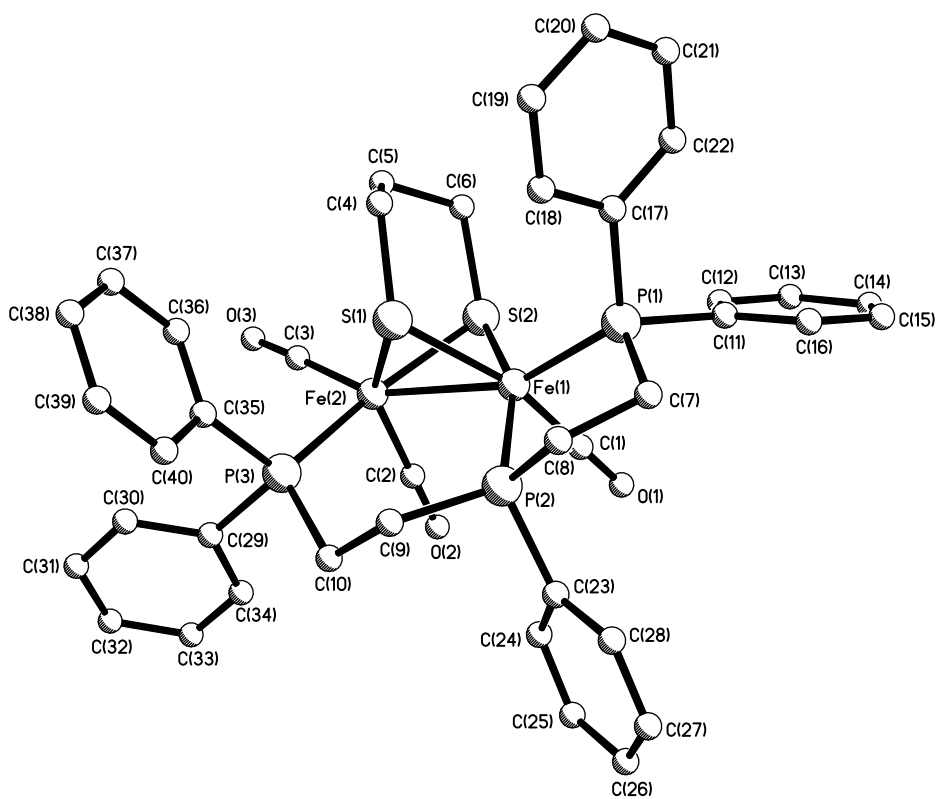

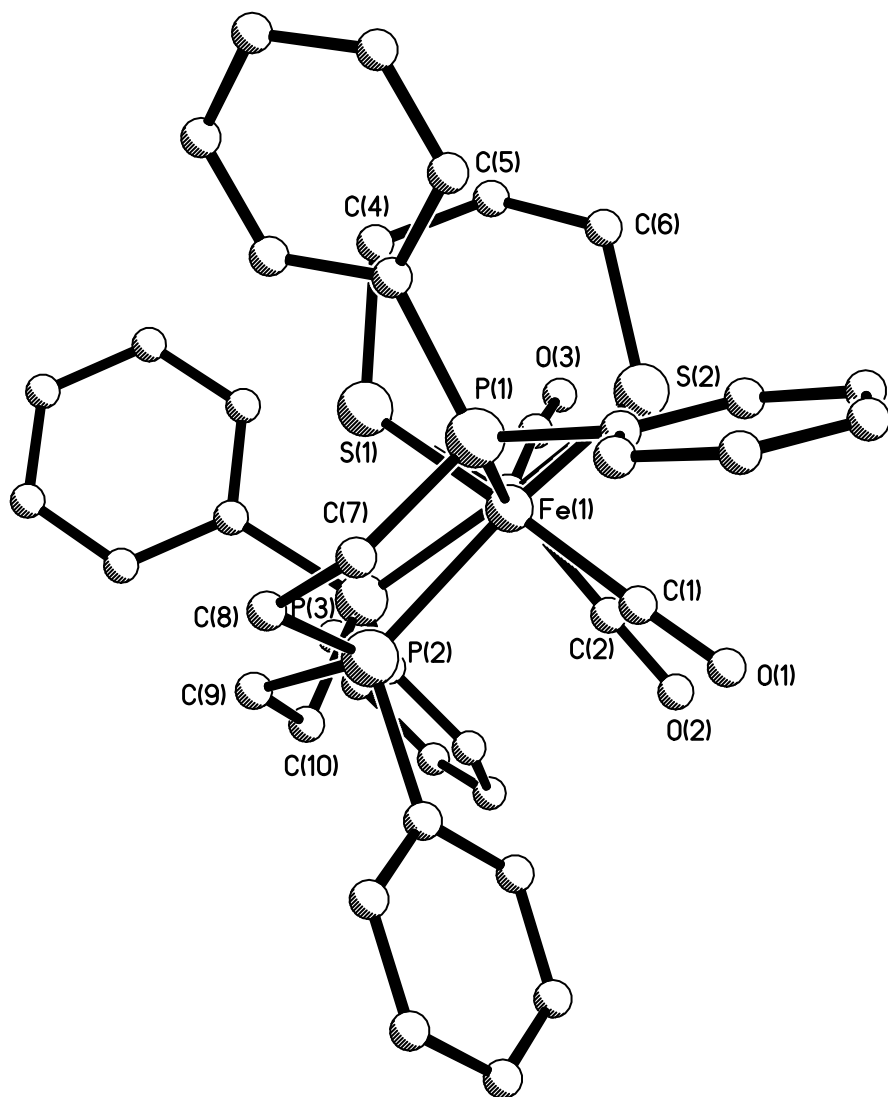

(vii) Table 1. Crystal data and structure refinement for str0735 (**3**).

|                                        |                                         |                           |
|----------------------------------------|-----------------------------------------|---------------------------|
| Identification code                    | str0735                                 |                           |
| Chemical formula                       | $C_{46}H_{44.50}Fe_2NO_{3.25}P_3S_2$    |                           |
| Formula weight                         | 932.06                                  |                           |
| Temperature                            | 150(2) K                                |                           |
| Radiation, wavelength                  | MoK $\alpha$ , 0.71073 Å                |                           |
| Crystal system, space group            | monoclinic, C2/c                        |                           |
| Unit cell parameters                   | a = 47.771(9) Å                         | $\alpha = 90^\circ$       |
|                                        | b = 11.747(2) Å                         | $\beta = 97.984(4)^\circ$ |
|                                        | c = 15.183(3) Å                         | $\gamma = 90^\circ$       |
| Cell volume                            | 8438(3) Å <sup>3</sup>                  |                           |
| Z                                      | 8                                       |                           |
| Calculated density                     | 1.467 g/cm <sup>3</sup>                 |                           |
| Absorption coefficient $\mu$           | 0.944 mm <sup>-1</sup>                  |                           |
| F(000)                                 | 3860                                    |                           |
| Crystal colour and size                | red, 0.14 × 0.13 × 0.09 mm <sup>3</sup> |                           |
| Data collection method                 | Bruker SMART APEX diffractometer        |                           |
|                                        | $\omega$ rotation with narrow frames    |                           |
| $\theta$ range for data collection     | 2.45 to 28.34°                          |                           |
| Index ranges                           | h -61 to 63, k -15 to 15, l -20 to 20   |                           |
| Completeness to $\theta = 26.00^\circ$ | 99.4 %                                  |                           |
| Reflections collected                  | 35672                                   |                           |
| Independent reflections                | 10136 ( $R_{int} = 0.0550$ )            |                           |
| Reflections with $F^2 > 2\sigma$       | 7618                                    |                           |
| Absorption correction                  | semi-empirical from equivalents         |                           |
| Min. and max. transmission             | 0.8792 and 0.9199                       |                           |
| Structure solution                     | direct methods                          |                           |
| Refinement method                      | Full-matrix least-squares on $F^2$      |                           |
| Weighting parameters a, b              | 0.0609, 2.3320                          |                           |
| Data / restraints / parameters         | 10136 / 0 / 518                         |                           |
| Final R indices [ $F^2 > 2\sigma$ ]    | R1 = 0.0500, wR2 = 0.1107               |                           |
| R indices (all data)                   | R1 = 0.0736, wR2 = 0.1203               |                           |
| Goodness-of-fit on $F^2$               | 1.049                                   |                           |
| Largest and mean shift/su              | 0.001 and 0.000                         |                           |
| Largest diff. peak and hole            | 0.707 and -0.497 e Å <sup>-3</sup>      |                           |

Table 2. Atomic coordinates and equivalent isotropic displacement parameters ( $\text{\AA}^2$ ) for str0735.  $U_{\text{eq}}$  is defined as one third of the trace of the orthogonalized  $U^{ij}$  tensor.

|       | x            | y           | z           | $U_{\text{eq}}$ |
|-------|--------------|-------------|-------------|-----------------|
| Fe(1) | 0.092868(8)  | 0.18890(3)  | 0.49035(2)  | 0.01557(10)     |
| Fe(2) | 0.139123(8)  | 0.28551(3)  | 0.46162(3)  | 0.01703(10)     |
| P(1)  | 0.056025(15) | 0.23383(6)  | 0.38739(5)  | 0.01758(15)     |
| P(2)  | 0.094368(15) | 0.02960(6)  | 0.41550(5)  | 0.01703(15)     |
| P(3)  | 0.165583(15) | 0.16558(6)  | 0.39719(5)  | 0.01996(16)     |
| S(1)  | 0.104820(14) | 0.36803(6)  | 0.52766(4)  | 0.01828(15)     |
| S(2)  | 0.135642(14) | 0.14610(6)  | 0.56169(4)  | 0.01764(15)     |
| N(1)  | 0.14372(5)   | 0.3269(2)   | 0.67774(15) | 0.0230(5)       |
| O(1)  | 0.05954(5)   | 0.1263(2)   | 0.62946(14) | 0.0362(5)       |
| O(2)  | 0.11626(5)   | 0.37997(19) | 0.28922(14) | 0.0332(5)       |
| O(3)  | 0.18251(5)   | 0.45444(19) | 0.51976(16) | 0.0387(6)       |
| C(1)  | 0.07194(6)   | 0.1497(2)   | 0.57127(19) | 0.0222(6)       |
| C(2)  | 0.12483(6)   | 0.3423(2)   | 0.35745(19) | 0.0220(6)       |
| C(3)  | 0.16625(6)   | 0.3848(3)   | 0.49867(19) | 0.0243(6)       |
| C(4)  | 0.05143(6)   | 0.1217(2)   | 0.30127(18) | 0.0221(6)       |
| C(5)  | 0.06068(6)   | 0.0065(2)   | 0.34296(19) | 0.0227(6)       |
| C(6)  | 0.11957(6)   | 0.0222(2)   | 0.33465(18) | 0.0222(6)       |
| C(7)  | 0.15066(6)   | 0.0219(2)   | 0.37784(19) | 0.0222(6)       |
| C(8)  | 0.11705(7)   | 0.3812(3)   | 0.64706(18) | 0.0262(7)       |
| C(9)  | 0.14102(6)   | 0.2045(2)   | 0.67418(18) | 0.0221(6)       |
| C(10) | 0.15443(6)   | 0.3673(3)   | 0.76788(19) | 0.0269(7)       |
| C(11) | 0.18349(6)   | 0.3212(3)   | 0.8008(2)   | 0.0268(7)       |
| C(12) | 0.18846(7)   | 0.2665(3)   | 0.8821(2)   | 0.0360(8)       |
| C(13) | 0.21497(9)   | 0.2255(4)   | 0.9137(2)   | 0.0499(10)      |
| C(14) | 0.23697(8)   | 0.2400(4)   | 0.8652(3)   | 0.0521(11)      |
| C(15) | 0.23245(8)   | 0.2932(3)   | 0.7841(3)   | 0.0457(9)       |
| C(16) | 0.20568(7)   | 0.3328(3)   | 0.7515(2)   | 0.0365(8)       |
| C(17) | 0.02234(6)   | 0.2303(2)   | 0.43347(18) | 0.0204(6)       |
| C(18) | 0.01701(6)   | 0.3164(3)   | 0.4921(2)   | 0.0275(7)       |
| C(19) | -0.00734(7)  | 0.3153(3)   | 0.5317(2)   | 0.0324(7)       |
| C(20) | -0.02690(7)  | 0.2284(3)   | 0.5129(2)   | 0.0325(7)       |
| C(21) | -0.02162(7)  | 0.1414(3)   | 0.4569(2)   | 0.0326(7)       |
| C(22) | 0.00289(6)   | 0.1420(3)   | 0.4167(2)   | 0.0264(7)       |
| C(23) | 0.05115(6)   | 0.3649(2)   | 0.32049(18) | 0.0206(6)       |
| C(24) | 0.05652(6)   | 0.4709(2)   | 0.35941(19) | 0.0258(6)       |
| C(25) | 0.05268(6)   | 0.5699(3)   | 0.3103(2)   | 0.0287(7)       |
| C(26) | 0.04329(7)   | 0.5662(3)   | 0.2208(2)   | 0.0357(8)       |
| C(27) | 0.03789(9)   | 0.4615(3)   | 0.1805(2)   | 0.0511(11)      |
| C(28) | 0.04169(8)   | 0.3620(3)   | 0.2296(2)   | 0.0405(9)       |
| C(29) | 0.09996(6)   | -0.1073(2)  | 0.47225(18) | 0.0192(6)       |
| C(30) | 0.09848(6)   | -0.1150(2)  | 0.56323(19) | 0.0245(6)       |
| C(31) | 0.10041(8)   | -0.2196(3)  | 0.6055(2)   | 0.0354(8)       |
| C(32) | 0.10444(8)   | -0.3172(3)  | 0.5585(2)   | 0.0389(8)       |
| C(33) | 0.10672(7)   | -0.3111(2)  | 0.4697(2)   | 0.0307(7)       |
| C(34) | 0.10409(6)   | -0.2071(2)  | 0.4260(2)   | 0.0268(7)       |
| C(35) | 0.20089(6)   | 0.1296(2)   | 0.4542(2)   | 0.0248(6)       |
| C(36) | 0.20770(7)   | 0.1417(4)   | 0.5451(2)   | 0.0444(9)       |
| C(37) | 0.23354(8)   | 0.1043(4)   | 0.5885(3)   | 0.0549(11)      |
| C(38) | 0.25308(7)   | 0.0584(3)   | 0.5413(3)   | 0.0460(9)       |



|       |             |           |             |            |
|-------|-------------|-----------|-------------|------------|
| C(39) | 0.24717(7)  | 0.0507(4) | 0.4500(3)   | 0.0482(10) |
| C(40) | 0.22114(7)  | 0.0836(3) | 0.4077(2)   | 0.0417(9)  |
| C(41) | 0.17341(6)  | 0.2084(2) | 0.28781(19) | 0.0227(6)  |
| C(42) | 0.16830(7)  | 0.1419(3) | 0.2117(2)   | 0.0352(8)  |
| C(43) | 0.17407(8)  | 0.1832(3) | 0.1304(2)   | 0.0417(9)  |
| C(44) | 0.18527(7)  | 0.2899(3) | 0.1244(2)   | 0.0370(8)  |
| C(45) | 0.19067(8)  | 0.3559(3) | 0.1988(2)   | 0.0388(8)  |
| C(46) | 0.18475(7)  | 0.3165(3) | 0.2799(2)   | 0.0327(7)  |
| O(4)  | -0.0025(12) | -0.126(2) | 0.270(3)    | 0.224(14)  |

Table 3. Bond lengths [Å] and angles [°] for str0735.

|                  |            |                  |            |
|------------------|------------|------------------|------------|
| Fe(1)–C(1)       | 1.750(3)   | Fe(1)–P(2)       | 2.1957(8)  |
| Fe(1)–S(1)       | 2.2328(8)  | Fe(1)–S(2)       | 2.2331(8)  |
| Fe(1)–P(1)       | 2.2485(9)  | Fe(1)–Fe(2)      | 2.5746(7)  |
| Fe(2)–C(2)       | 1.764(3)   | Fe(2)–C(3)       | 1.775(3)   |
| Fe(2)–P(3)       | 2.2098(8)  | Fe(2)–S(1)       | 2.2554(8)  |
| Fe(2)–S(2)       | 2.2558(8)  | P(1)–C(23)       | 1.841(3)   |
| P(1)–C(17)       | 1.842(3)   | P(1)–C(4)        | 1.847(3)   |
| P(2)–C(29)       | 1.827(3)   | P(2)–C(6)        | 1.837(3)   |
| P(2)–C(5)        | 1.839(3)   | P(3)–C(41)       | 1.823(3)   |
| P(3)–C(35)       | 1.835(3)   | P(3)–C(7)        | 1.840(3)   |
| S(1)–C(8)        | 1.832(3)   | S(2)–C(9)        | 1.825(3)   |
| N(1)–C(8)        | 1.443(4)   | N(1)–C(9)        | 1.445(4)   |
| N(1)–C(10)       | 1.471(4)   | O(1)–C(1)        | 1.163(3)   |
| O(2)–C(2)        | 1.148(3)   | O(3)–C(3)        | 1.143(3)   |
| C(4)–C(5)        | 1.533(4)   | C(6)–C(7)        | 1.538(4)   |
| C(10)–C(11)      | 1.509(4)   | C(11)–C(12)      | 1.383(4)   |
| C(11)–C(16)      | 1.387(4)   | C(12)–C(13)      | 1.377(5)   |
| C(13)–C(14)      | 1.375(6)   | C(14)–C(15)      | 1.372(6)   |
| C(15)–C(16)      | 1.386(5)   | C(17)–C(22)      | 1.393(4)   |
| C(17)–C(18)      | 1.394(4)   | C(18)–C(19)      | 1.382(4)   |
| C(19)–C(20)      | 1.387(4)   | C(20)–C(21)      | 1.376(5)   |
| C(21)–C(22)      | 1.393(4)   | C(23)–C(24)      | 1.387(4)   |
| C(23)–C(28)      | 1.392(4)   | C(24)–C(25)      | 1.379(4)   |
| C(25)–C(26)      | 1.371(4)   | C(26)–C(27)      | 1.382(5)   |
| C(27)–C(28)      | 1.384(4)   | C(29)–C(34)      | 1.394(4)   |
| C(29)–C(30)      | 1.396(4)   | C(30)–C(31)      | 1.383(4)   |
| C(31)–C(32)      | 1.379(5)   | C(32)–C(33)      | 1.369(5)   |
| C(33)–C(34)      | 1.388(4)   | C(35)–C(36)      | 1.380(4)   |
| C(35)–C(40)      | 1.384(4)   | C(36)–C(37)      | 1.388(5)   |
| C(37)–C(38)      | 1.365(5)   | C(38)–C(39)      | 1.379(5)   |
| C(39)–C(40)      | 1.374(5)   | C(41)–C(42)      | 1.388(4)   |
| C(41)–C(46)      | 1.392(4)   | C(42)–C(43)      | 1.389(4)   |
| C(43)–C(44)      | 1.371(5)   | C(44)–C(45)      | 1.365(5)   |
| C(45)–C(46)      | 1.381(4)   | O(4)–O(4A)       | 0.67(9)    |
|                  |            |                  |            |
| C(1)–Fe(1)–P(2)  | 101.67(10) | C(1)–Fe(1)–S(1)  | 102.74(10) |
| P(2)–Fe(1)–S(1)  | 155.37(3)  | C(1)–Fe(1)–S(2)  | 100.00(10) |
| P(2)–Fe(1)–S(2)  | 88.03(3)   | S(1)–Fe(1)–S(2)  | 84.53(3)   |
| C(1)–Fe(1)–P(1)  | 94.68(10)  | P(2)–Fe(1)–P(1)  | 85.35(3)   |
| S(1)–Fe(1)–P(1)  | 95.91(3)   | S(2)–Fe(1)–P(1)  | 164.85(3)  |
| C(1)–Fe(1)–Fe(2) | 145.32(10) | P(2)–Fe(1)–Fe(2) | 101.39(3)  |
| S(1)–Fe(1)–Fe(2) | 55.41(2)   | S(2)–Fe(1)–Fe(2) | 55.42(2)   |
| P(1)–Fe(1)–Fe(2) | 112.71(3)  | C(2)–Fe(2)–C(3)  | 102.13(13) |
| C(2)–Fe(2)–P(3)  | 91.04(9)   | C(3)–Fe(2)–P(3)  | 96.99(10)  |
| C(2)–Fe(2)–S(1)  | 91.22(9)   | C(3)–Fe(2)–S(1)  | 96.91(9)   |
| P(3)–Fe(2)–S(1)  | 165.11(3)  | C(2)–Fe(2)–S(2)  | 145.37(9)  |
| C(3)–Fe(2)–S(2)  | 112.47(10) | P(3)–Fe(2)–S(2)  | 86.30(3)   |
| S(1)–Fe(2)–S(2)  | 83.49(3)   | C(2)–Fe(2)–Fe(1) | 94.83(9)   |
| C(3)–Fe(2)–Fe(1) | 147.31(9)  | P(3)–Fe(2)–Fe(1) | 110.56(3)  |
| S(1)–Fe(2)–Fe(1) | 54.58(2)   | S(2)–Fe(2)–Fe(1) | 54.59(2)   |
| C(23)–P(1)–C(17) | 100.25(12) | C(23)–P(1)–C(4)  | 102.25(13) |
| C(17)–P(1)–C(4)  | 103.21(13) | C(23)–P(1)–Fe(1) | 127.35(9)  |
| C(17)–P(1)–Fe(1) | 111.80(9)  | C(4)–P(1)–Fe(1)  | 109.23(9)  |

|                   |            |                   |            |
|-------------------|------------|-------------------|------------|
| C(29)–P(2)–C(6)   | 101.95(13) | C(29)–P(2)–C(5)   | 102.19(13) |
| C(6)–P(2)–C(5)    | 101.13(13) | C(29)–P(2)–Fe(1)  | 121.30(9)  |
| C(6)–P(2)–Fe(1)   | 117.24(9)  | C(5)–P(2)–Fe(1)   | 110.29(9)  |
| C(41)–P(3)–C(35)  | 101.64(13) | C(41)–P(3)–C(7)   | 103.40(13) |
| C(35)–P(3)–C(7)   | 100.06(13) | C(41)–P(3)–Fe(2)  | 115.45(10) |
| C(35)–P(3)–Fe(2)  | 118.87(10) | C(7)–P(3)–Fe(2)   | 115.01(9)  |
| C(8)–S(1)–Fe(1)   | 111.46(10) | C(8)–S(1)–Fe(2)   | 108.95(10) |
| Fe(1)–S(1)–Fe(2)  | 70.01(2)   | C(9)–S(2)–Fe(1)   | 111.69(10) |
| C(9)–S(2)–Fe(2)   | 110.09(9)  | Fe(1)–S(2)–Fe(2)  | 69.99(2)   |
| C(8)–N(1)–C(9)    | 111.0(2)   | C(8)–N(1)–C(10)   | 109.6(2)   |
| C(9)–N(1)–C(10)   | 111.9(2)   | O(1)–C(1)–Fe(1)   | 175.3(3)   |
| O(2)–C(2)–Fe(2)   | 178.1(3)   | O(3)–C(3)–Fe(2)   | 175.2(3)   |
| C(5)–C(4)–P(1)    | 109.76(18) | C(4)–C(5)–P(2)    | 107.17(19) |
| C(7)–C(6)–P(2)    | 113.51(19) | C(6)–C(7)–P(3)    | 113.30(19) |
| N(1)–C(8)–S(1)    | 115.32(19) | N(1)–C(9)–S(2)    | 114.16(19) |
| N(1)–C(10)–C(11)  | 112.2(2)   | C(12)–C(11)–C(16) | 118.6(3)   |
| C(12)–C(11)–C(10) | 119.9(3)   | C(16)–C(11)–C(10) | 121.5(3)   |
| C(13)–C(12)–C(11) | 120.6(3)   | C(14)–C(13)–C(12) | 120.3(4)   |
| C(15)–C(14)–C(13) | 120.0(4)   | C(14)–C(15)–C(16) | 119.7(4)   |
| C(15)–C(16)–C(11) | 120.8(3)   | C(22)–C(17)–C(18) | 118.7(3)   |
| C(22)–C(17)–P(1)  | 122.9(2)   | C(18)–C(17)–P(1)  | 118.2(2)   |
| C(19)–C(18)–C(17) | 120.8(3)   | C(18)–C(19)–C(20) | 120.0(3)   |
| C(21)–C(20)–C(19) | 119.9(3)   | C(20)–C(21)–C(22) | 120.3(3)   |
| C(17)–C(22)–C(21) | 120.2(3)   | C(24)–C(23)–C(28) | 117.4(3)   |
| C(24)–C(23)–P(1)  | 120.9(2)   | C(28)–C(23)–P(1)  | 121.7(2)   |
| C(25)–C(24)–C(23) | 121.6(3)   | C(26)–C(25)–C(24) | 120.6(3)   |
| C(25)–C(26)–C(27) | 118.8(3)   | C(26)–C(27)–C(28) | 120.7(3)   |
| C(27)–C(28)–C(23) | 120.8(3)   | C(34)–C(29)–C(30) | 118.3(3)   |
| C(34)–C(29)–P(2)  | 121.6(2)   | C(30)–C(29)–P(2)  | 120.0(2)   |
| C(31)–C(30)–C(29) | 120.5(3)   | C(32)–C(31)–C(30) | 120.2(3)   |
| C(33)–C(32)–C(31) | 120.2(3)   | C(32)–C(33)–C(34) | 120.2(3)   |
| C(33)–C(34)–C(29) | 120.6(3)   | C(36)–C(35)–C(40) | 117.7(3)   |
| C(36)–C(35)–P(3)  | 121.4(2)   | C(40)–C(35)–P(3)  | 120.7(2)   |
| C(35)–C(36)–C(37) | 120.9(3)   | C(38)–C(37)–C(36) | 120.2(4)   |
| C(37)–C(38)–C(39) | 119.6(3)   | C(40)–C(39)–C(38) | 119.9(3)   |
| C(39)–C(40)–C(35) | 121.5(3)   | C(42)–C(41)–C(46) | 117.8(3)   |
| C(42)–C(41)–P(3)  | 124.6(2)   | C(46)–C(41)–P(3)  | 117.5(2)   |
| C(41)–C(42)–C(43) | 120.6(3)   | C(44)–C(43)–C(42) | 120.4(3)   |
| C(45)–C(44)–C(43) | 119.7(3)   | C(44)–C(45)–C(46) | 120.5(3)   |
| C(45)–C(46)–C(41) | 120.9(3)   |                   |            |

Symmetry operations for equivalent atoms

A  $-x, y, -z+1/2$

Table 4. Anisotropic displacement parameters ( $\text{\AA}^2$ ) for str0735. The anisotropic displacement factor exponent takes the form:  $-2\pi^2[h^2a^{*2}U^{11} + \dots + 2hka^*b^*U^{12}]$

|              | U <sup>11</sup> | U <sup>22</sup> | U <sup>33</sup> | U <sup>23</sup> | U <sup>13</sup> | U <sup>12</sup> |
|--------------|-----------------|-----------------|-----------------|-----------------|-----------------|-----------------|
| Fe(1)        | 0.0178(2)       | 0.01426(19)     | 0.01475(19)     | -0.00009(14)    | 0.00249(15)     |                 |
| -0.00046(14) |                 |                 |                 |                 |                 |                 |
| Fe(2)        | 0.0197(2)       | 0.0156(2)       | 0.0160(2)       | 0.00018(15)     | 0.00310(15)     |                 |
| -0.00198(15) |                 |                 |                 |                 |                 |                 |
| P(1)         | 0.0194(4)       | 0.0175(4)       | 0.0156(3)       | 0.0001(3)       | 0.0017(3)       | -0.0006(3)      |
| P(2)         | 0.0203(4)       | 0.0138(3)       | 0.0172(3)       | -0.0008(3)      | 0.0034(3)       | -0.0013(3)      |
| P(3)         | 0.0212(4)       | 0.0198(4)       | 0.0198(4)       | -0.0014(3)      | 0.0064(3)       | -0.0017(3)      |
| S(1)         | 0.0226(4)       | 0.0149(3)       | 0.0168(3)       | -0.0003(2)      | 0.0007(3)       | 0.0011(3)       |
| S(2)         | 0.0199(3)       | 0.0154(3)       | 0.0173(3)       | 0.0001(2)       | 0.0013(3)       | -0.0003(2)      |
| N(1)         | 0.0318(14)      | 0.0190(12)      | 0.0167(12)      | -0.0012(9)      | -0.0021(10)     | 0.0013(10)      |
| O(1)         | 0.0387(13)      | 0.0433(14)      | 0.0298(12)      | 0.0099(10)      | 0.0160(10)      | 0.0019(11)      |
| O(2)         | 0.0347(13)      | 0.0436(14)      | 0.0218(11)      | 0.0085(10)      | 0.0056(10)      | 0.0041(10)      |
| O(3)         | 0.0333(13)      | 0.0355(13)      | 0.0485(15)      | -0.0139(11)     | 0.0095(11)      | -0.0151(11)     |
| C(1)         | 0.0226(15)      | 0.0214(15)      | 0.0222(15)      | -0.0003(11)     | 0.0024(12)      | 0.0033(11)      |
| C(2)         | 0.0214(15)      | 0.0217(15)      | 0.0240(15)      | 0.0010(12)      | 0.0070(12)      | -0.0017(11)     |
| C(3)         | 0.0255(16)      | 0.0244(16)      | 0.0238(15)      | -0.0029(12)     | 0.0059(12)      | 0.0007(12)      |
| C(4)         | 0.0259(15)      | 0.0236(15)      | 0.0157(14)      | -0.0017(11)     | -0.0011(11)     | 0.0002(12)      |
| C(5)         | 0.0251(15)      | 0.0185(14)      | 0.0227(15)      | -0.0034(11)     | -0.0025(12)     | -0.0009(11)     |
| C(6)         | 0.0281(16)      | 0.0210(14)      | 0.0187(14)      | -0.0039(11)     | 0.0073(12)      | -0.0039(12)     |
| C(7)         | 0.0258(15)      | 0.0181(14)      | 0.0242(15)      | -0.0007(11)     | 0.0091(12)      | 0.0011(11)      |
| C(8)         | 0.0364(17)      | 0.0250(16)      | 0.0158(14)      | -0.0059(11)     | -0.0012(12)     | 0.0060(13)      |
| C(9)         | 0.0309(16)      | 0.0206(14)      | 0.0139(13)      | 0.0018(11)      | 0.0003(11)      | -0.0013(12)     |
| C(10)        | 0.0291(17)      | 0.0302(17)      | 0.0210(15)      | -0.0041(12)     | 0.0018(12)      | 0.0022(13)      |
| C(11)        | 0.0259(16)      | 0.0266(16)      | 0.0266(16)      | -0.0070(13)     | -0.0009(13)     | -0.0028(12)     |
| C(12)        | 0.0361(19)      | 0.048(2)        | 0.0227(17)      | -0.0055(15)     | -0.0003(14)     | 0.0032(16)      |
| C(13)        | 0.053(2)        | 0.066(3)        | 0.0280(19)      | 0.0001(18)      | -0.0055(17)     | 0.016(2)        |
| C(14)        | 0.032(2)        | 0.077(3)        | 0.044(2)        | -0.009(2)       | -0.0075(18)     | 0.0101(19)      |
| C(15)        | 0.030(2)        | 0.056(2)        | 0.052(2)        | -0.0065(19)     | 0.0103(17)      | -0.0017(17)     |
| C(16)        | 0.0371(19)      | 0.0379(19)      | 0.0342(19)      | 0.0007(15)      | 0.0042(15)      | -0.0018(15)     |
| C(17)        | 0.0180(14)      | 0.0243(15)      | 0.0178(14)      | 0.0049(11)      | -0.0012(11)     | -0.0001(11)     |
| C(18)        | 0.0225(16)      | 0.0323(17)      | 0.0286(16)      | -0.0037(13)     | 0.0063(13)      | -0.0033(13)     |
| C(19)        | 0.0293(17)      | 0.0385(19)      | 0.0303(17)      | -0.0038(14)     | 0.0076(14)      | 0.0003(14)      |
| C(20)        | 0.0218(16)      | 0.042(2)        | 0.0349(18)      | 0.0031(15)      | 0.0097(13)      | -0.0022(14)     |
| C(21)        | 0.0253(17)      | 0.0314(18)      | 0.0415(19)      | 0.0032(14)      | 0.0064(14)      | -0.0075(13)     |
| C(22)        | 0.0241(16)      | 0.0272(16)      | 0.0273(16)      | -0.0030(12)     | 0.0013(13)      | -0.0029(12)     |
| C(23)        | 0.0186(14)      | 0.0223(14)      | 0.0211(14)      | 0.0033(11)      | 0.0040(11)      | 0.0008(11)      |
| C(24)        | 0.0272(16)      | 0.0271(16)      | 0.0216(15)      | 0.0016(12)      | -0.0018(12)     | 0.0013(12)      |
| C(25)        | 0.0304(17)      | 0.0216(15)      | 0.0327(17)      | 0.0008(13)      | -0.0003(13)     | 0.0005(13)      |
| C(26)        | 0.046(2)        | 0.0279(17)      | 0.0306(18)      | 0.0122(14)      | -0.0047(15)     | -0.0016(15)     |
| C(27)        | 0.090(3)        | 0.031(2)        | 0.0250(18)      | 0.0092(15)      | -0.0165(19)     | -0.0075(19)     |
| C(28)        | 0.065(2)        | 0.0251(17)      | 0.0265(17)      | 0.0016(14)      | -0.0106(16)     | -0.0068(16)     |
| C(29)        | 0.0185(14)      | 0.0150(13)      | 0.0242(15)      | 0.0019(11)      | 0.0030(11)      | -0.0028(10)     |
| C(30)        | 0.0315(17)      | 0.0185(14)      | 0.0233(15)      | -0.0010(11)     | 0.0027(12)      | -0.0020(12)     |
| C(31)        | 0.052(2)        | 0.0275(17)      | 0.0257(17)      | 0.0030(13)      | 0.0007(15)      | -0.0032(15)     |
| C(32)        | 0.058(2)        | 0.0180(16)      | 0.039(2)        | 0.0078(14)      | 0.0000(17)      | -0.0014(15)     |
| C(33)        | 0.0400(19)      | 0.0149(15)      | 0.0375(18)      | -0.0029(13)     | 0.0070(15)      | 0.0011(13)      |
| C(34)        | 0.0310(17)      | 0.0220(15)      | 0.0282(16)      | -0.0041(12)     | 0.0068(13)      | -0.0023(12)     |
| C(35)        | 0.0215(15)      | 0.0243(15)      | 0.0290(16)      | -0.0005(12)     | 0.0052(12)      | -0.0011(12)     |
| C(36)        | 0.0260(18)      | 0.072(3)        | 0.035(2)        | -0.0116(18)     | 0.0024(15)      | 0.0120(17)      |
| C(37)        | 0.035(2)        | 0.091(3)        | 0.036(2)        | -0.010(2)       | -0.0044(17)     | 0.017(2)        |
| C(38)        | 0.0212(17)      | 0.058(2)        | 0.057(2)        | -0.0069(19)     | -0.0017(16)     | 0.0053(16)      |
| C(39)        | 0.0220(18)      | 0.072(3)        | 0.052(2)        | -0.010(2)       | 0.0097(16)      | 0.0048(17)      |
| C(40)        | 0.0309(19)      | 0.056(2)        | 0.039(2)        | -0.0044(17)     | 0.0090(15)      | 0.0052(17)      |
| C(41)        | 0.0222(15)      | 0.0258(15)      | 0.0218(15)      | 0.0018(12)      | 0.0089(12)      | -0.0011(12)     |
| C(42)        | 0.042(2)        | 0.0372(19)      | 0.0289(17)      | -0.0061(14)     | 0.0130(15)      | -0.0122(15)     |
| C(43)        | 0.047(2)        | 0.056(2)        | 0.0238(17)      | -0.0091(16)     | 0.0108(15)      | -0.0124(18)     |
| C(44)        | 0.0371(19)      | 0.050(2)        | 0.0267(17)      | 0.0095(15)      | 0.0125(15)      | 0.0009(16)      |
| C(45)        | 0.055(2)        | 0.0270(17)      | 0.039(2)        | 0.0039(15)      | 0.0231(17)      | -0.0044(16)     |
| C(46)        | 0.046(2)        | 0.0271(17)      | 0.0280(17)      | -0.0037(13)     | 0.0154(15)      | -0.0052(14)     |

Table 5. Hydrogen coordinates and isotropic displacement parameters ( $\text{\AA}^2$ ) for str0735.

|        | x       | y       | z      | U     |
|--------|---------|---------|--------|-------|
| H(4A)  | 0.0313  | 0.1179  | 0.2744 | 0.027 |
| H(4B)  | 0.0629  | 0.1402  | 0.2537 | 0.027 |
| H(5A)  | 0.0632  | -0.0495 | 0.2960 | 0.027 |
| H(5B)  | 0.0462  | -0.0228 | 0.3780 | 0.027 |
| H(6A)  | 0.1158  | -0.0478 | 0.2986 | 0.027 |
| H(6B)  | 0.1164  | 0.0881  | 0.2939 | 0.027 |
| H(7A)  | 0.1620  | -0.0205 | 0.3390 | 0.027 |
| H(7B)  | 0.1521  | -0.0189 | 0.4354 | 0.027 |
| H(8A)  | 0.1187  | 0.4631  | 0.6622 | 0.031 |
| H(8B)  | 0.1025  | 0.3484  | 0.6800 | 0.031 |
| H(9A)  | 0.1249  | 0.1819  | 0.7048 | 0.027 |
| H(9B)  | 0.1583  | 0.1703  | 0.7072 | 0.027 |
| H(10A) | 0.1412  | 0.3436  | 0.8092 | 0.032 |
| H(10B) | 0.1551  | 0.4515  | 0.7678 | 0.032 |
| H(12A) | 0.1735  | 0.2572  | 0.9166 | 0.043 |
| H(13A) | 0.2181  | 0.1869  | 0.9692 | 0.060 |
| H(14A) | 0.2553  | 0.2132  | 0.8880 | 0.062 |
| H(15A) | 0.2476  | 0.3029  | 0.7503 | 0.055 |
| H(16A) | 0.2025  | 0.3682  | 0.6947 | 0.044 |
| H(18A) | 0.0303  | 0.3764  | 0.5050 | 0.033 |
| H(19A) | -0.0107 | 0.3742  | 0.5719 | 0.039 |
| H(20A) | -0.0439 | 0.2290  | 0.5387 | 0.039 |
| H(21A) | -0.0347 | 0.0807  | 0.4455 | 0.039 |
| H(22A) | 0.0063  | 0.0819  | 0.3777 | 0.032 |
| H(24A) | 0.0630  | 0.4755  | 0.4214 | 0.031 |
| H(25A) | 0.0566  | 0.6413  | 0.3388 | 0.034 |
| H(26A) | 0.0405  | 0.6344  | 0.1871 | 0.043 |
| H(27A) | 0.0315  | 0.4577  | 0.1185 | 0.061 |
| H(28A) | 0.0378  | 0.2908  | 0.2008 | 0.049 |
| H(30A) | 0.0961  | -0.0479 | 0.5964 | 0.029 |
| H(31A) | 0.0990  | -0.2241 | 0.6672 | 0.042 |
| H(32A) | 0.1056  | -0.3889 | 0.5877 | 0.047 |
| H(33A) | 0.1101  | -0.3782 | 0.4379 | 0.037 |
| H(34A) | 0.1051  | -0.2038 | 0.3640 | 0.032 |
| H(36A) | 0.1945  | 0.1760  | 0.5783 | 0.053 |
| H(37A) | 0.2376  | 0.1108  | 0.6514 | 0.066 |
| H(38A) | 0.2707  | 0.0318  | 0.5712 | 0.055 |
| H(39A) | 0.2611  | 0.0227  | 0.4165 | 0.058 |
| H(40A) | 0.2169  | 0.0746  | 0.3451 | 0.050 |
| H(42A) | 0.1608  | 0.0675  | 0.2153 | 0.042 |
| H(43A) | 0.1702  | 0.1372  | 0.0787 | 0.050 |
| H(44A) | 0.1892  | 0.3177  | 0.0687 | 0.044 |
| H(45A) | 0.1986  | 0.4297  | 0.1948 | 0.047 |
| H(46A) | 0.1885  | 0.3637  | 0.3309 | 0.039 |

Table 6. Torsion angles [°] for str0735.

|                        |             |                        |             |
|------------------------|-------------|------------------------|-------------|
| C(1)–Fe(1)–Fe(2)–C(2)  | –146.35(19) | P(2)–Fe(1)–Fe(2)–C(2)  | 82.83(10)   |
| S(1)–Fe(1)–Fe(2)–C(2)  | –88.07(10)  | S(2)–Fe(1)–Fe(2)–C(2)  | 162.38(10)  |
| P(1)–Fe(1)–Fe(2)–C(2)  | –6.86(10)   | C(1)–Fe(1)–Fe(2)–C(3)  | –24.9(2)    |
| P(2)–Fe(1)–Fe(2)–C(3)  | –155.68(18) | S(1)–Fe(1)–Fe(2)–C(3)  | 33.42(18)   |
| S(2)–Fe(1)–Fe(2)–C(3)  | –76.14(18)  | P(1)–Fe(1)–Fe(2)–C(3)  | 114.62(18)  |
| C(1)–Fe(1)–Fe(2)–P(3)  | 120.72(16)  | P(2)–Fe(1)–Fe(2)–P(3)  | –10.10(3)   |
| S(1)–Fe(1)–Fe(2)–P(3)  | 179.00(3)   | S(2)–Fe(1)–Fe(2)–P(3)  | 69.44(3)    |
| P(1)–Fe(1)–Fe(2)–P(3)  | –99.80(4)   | C(1)–Fe(1)–Fe(2)–S(1)  | –58.28(16)  |
| P(2)–Fe(1)–Fe(2)–S(1)  | 170.90(3)   | S(2)–Fe(1)–Fe(2)–S(1)  | –109.56(3)  |
| P(1)–Fe(1)–Fe(2)–S(1)  | 81.20(3)    | C(1)–Fe(1)–Fe(2)–S(2)  | 51.28(16)   |
| P(2)–Fe(1)–Fe(2)–S(2)  | –79.54(3)   | S(1)–Fe(1)–Fe(2)–S(2)  | 109.56(3)   |
| P(1)–Fe(1)–Fe(2)–S(2)  | –169.24(3)  | C(1)–Fe(1)–P(1)–C(23)  | 130.71(15)  |
| P(2)–Fe(1)–P(1)–C(23)  | –127.93(12) | S(1)–Fe(1)–P(1)–C(23)  | 27.36(12)   |
| S(2)–Fe(1)–P(1)–C(23)  | –63.54(18)  | Fe(2)–Fe(1)–P(1)–C(23) | –27.52(12)  |
| C(1)–Fe(1)–P(1)–C(17)  | 7.60(14)    | P(2)–Fe(1)–P(1)–C(17)  | 108.95(10)  |
| S(1)–Fe(1)–P(1)–C(17)  | –95.76(10)  | S(2)–Fe(1)–P(1)–C(17)  | 173.34(14)  |
| Fe(2)–Fe(1)–P(1)–C(17) | –150.63(10) | C(1)–Fe(1)–P(1)–C(4)   | –106.00(14) |
| P(2)–Fe(1)–P(1)–C(4)   | –4.64(10)   | S(1)–Fe(1)–P(1)–C(4)   | 150.65(10)  |
| S(2)–Fe(1)–P(1)–C(4)   | 59.75(16)   | Fe(2)–Fe(1)–P(1)–C(4)  | 95.77(10)   |
| C(1)–Fe(1)–P(2)–C(29)  | –43.46(14)  | S(1)–Fe(1)–P(2)–C(29)  | 128.66(12)  |
| S(2)–Fe(1)–P(2)–C(29)  | 56.35(11)   | P(1)–Fe(1)–P(2)–C(29)  | –137.29(11) |
| Fe(2)–Fe(1)–P(2)–C(29) | 110.45(10)  | C(1)–Fe(1)–P(2)–C(6)   | –169.30(14) |
| S(1)–Fe(1)–P(2)–C(6)   | 2.82(14)    | S(2)–Fe(1)–P(2)–C(6)   | –69.49(11)  |
| P(1)–Fe(1)–P(2)–C(6)   | 96.87(11)   | Fe(2)–Fe(1)–P(2)–C(6)  | –15.38(11)  |
| C(1)–Fe(1)–P(2)–C(5)   | 75.76(14)   | S(1)–Fe(1)–P(2)–C(5)   | –112.12(12) |
| S(2)–Fe(1)–P(2)–C(5)   | 175.56(10)  | P(1)–Fe(1)–P(2)–C(5)   | –18.07(10)  |
| Fe(2)–Fe(1)–P(2)–C(5)  | –130.33(10) | C(2)–Fe(2)–P(3)–C(41)  | 23.81(14)   |
| C(3)–Fe(2)–P(3)–C(41)  | –78.55(14)  | S(1)–Fe(2)–P(3)–C(41)  | 122.54(15)  |
| S(2)–Fe(2)–P(3)–C(41)  | 169.25(11)  | Fe(1)–Fe(2)–P(3)–C(41) | 119.36(11)  |
| C(2)–Fe(2)–P(3)–C(35)  | 144.97(14)  | C(3)–Fe(2)–P(3)–C(35)  | 42.61(15)   |
| S(1)–Fe(2)–P(3)–C(35)  | –116.30(16) | S(2)–Fe(2)–P(3)–C(35)  | –69.60(11)  |
| Fe(1)–Fe(2)–P(3)–C(35) | –119.48(11) | C(2)–Fe(2)–P(3)–C(7)   | –96.53(14)  |
| C(3)–Fe(2)–P(3)–C(7)   | 161.11(14)  | S(1)–Fe(2)–P(3)–C(7)   | 2.20(18)    |
| S(2)–Fe(2)–P(3)–C(7)   | 48.90(11)   | Fe(1)–Fe(2)–P(3)–C(7)  | –0.98(11)   |
| C(1)–Fe(1)–S(1)–C(8)   | 47.05(14)   | P(2)–Fe(1)–S(1)–C(8)   | –125.04(13) |
| S(2)–Fe(1)–S(1)–C(8)   | –52.00(11)  | P(1)–Fe(1)–S(1)–C(8)   | 143.22(11)  |
| Fe(2)–Fe(1)–S(1)–C(8)  | –103.20(11) | C(1)–Fe(1)–S(1)–Fe(2)  | 150.25(10)  |
| P(2)–Fe(1)–S(1)–Fe(2)  | –21.84(8)   | S(2)–Fe(1)–S(1)–Fe(2)  | 51.20(3)    |
| P(1)–Fe(1)–S(1)–Fe(2)  | –113.58(3)  | C(2)–Fe(2)–S(1)–C(8)   | –158.28(14) |
| C(3)–Fe(2)–S(1)–C(8)   | –55.90(15)  | P(3)–Fe(2)–S(1)–C(8)   | 103.02(16)  |
| S(2)–Fe(2)–S(1)–C(8)   | 56.04(11)   | Fe(1)–Fe(2)–S(1)–C(8)  | 106.66(11)  |
| C(2)–Fe(2)–S(1)–Fe(1)  | 95.06(9)    | C(3)–Fe(2)–S(1)–Fe(1)  | –162.56(10) |
| P(3)–Fe(2)–S(1)–Fe(1)  | –3.65(13)   | S(2)–Fe(2)–S(1)–Fe(1)  | –50.62(2)   |
| C(1)–Fe(1)–S(2)–C(9)   | –48.81(14)  | P(2)–Fe(1)–S(2)–C(9)   | –150.31(10) |
| S(1)–Fe(1)–S(2)–C(9)   | 53.20(10)   | P(1)–Fe(1)–S(2)–C(9)   | 145.63(14)  |
| Fe(2)–Fe(1)–S(2)–C(9)  | 104.40(10)  | C(1)–Fe(1)–S(2)–Fe(2)  | –153.20(10) |
| P(2)–Fe(1)–S(2)–Fe(2)  | 105.29(3)   | S(1)–Fe(1)–S(2)–Fe(2)  | –51.19(3)   |
| P(1)–Fe(1)–S(2)–Fe(2)  | 41.23(12)   | C(2)–Fe(2)–S(2)–C(9)   | –138.66(19) |
| C(3)–Fe(2)–S(2)–C(9)   | 38.83(15)   | P(3)–Fe(2)–S(2)–C(9)   | 134.87(11)  |
| S(1)–Fe(2)–S(2)–C(9)   | –55.98(11)  | Fe(1)–Fe(2)–S(2)–C(9)  | –106.60(11) |

|                         |            |                         |            |
|-------------------------|------------|-------------------------|------------|
| C(2)–Fe(2)–S(2)–Fe(1)   | –32.06(17) | C(3)–Fe(2)–S(2)–Fe(1)   | 145.43(10) |
| P(3)–Fe(2)–S(2)–Fe(1)   | –118.53(3) | S(1)–Fe(2)–S(2)–Fe(1)   | 50.62(3)   |
| P(2)–Fe(1)–C(1)–O(1)    | 125(3)     | S(1)–Fe(1)–C(1)–O(1)    | –52(3)     |
| S(2)–Fe(1)–C(1)–O(1)    | 35(3)      | P(1)–Fe(1)–C(1)–O(1)    | –149(3)    |
| Fe(2)–Fe(1)–C(1)–O(1)   | –6(3)      | C(3)–Fe(2)–C(2)–O(2)    | 40(8)      |
| P(3)–Fe(2)–C(2)–O(2)    | –57(8)     | S(1)–Fe(2)–C(2)–O(2)    | 138(8)     |
| S(2)–Fe(2)–C(2)–O(2)    | –142(8)    | Fe(1)–Fe(2)–C(2)–O(2)   | –168(8)    |
| C(2)–Fe(2)–C(3)–O(3)    | 36(3)      | P(3)–Fe(2)–C(3)–O(3)    | 128(3)     |
| S(1)–Fe(2)–C(3)–O(3)    | –57(3)     | S(2)–Fe(2)–C(3)–O(3)    | –143(3)    |
| Fe(1)–Fe(2)–C(3)–O(3)   | –84(3)     | C(23)–P(1)–C(4)–C(5)    | 168.5(2)   |
| C(17)–P(1)–C(4)–C(5)    | –87.7(2)   | Fe(1)–P(1)–C(4)–C(5)    | 31.4(2)    |
| P(1)–C(4)–C(5)–P(2)     | –44.9(2)   | C(29)–P(2)–C(5)–C(4)    | 171.95(19) |
| C(6)–P(2)–C(5)–C(4)     | –83.1(2)   | Fe(1)–P(2)–C(5)–C(4)    | 41.7(2)    |
| C(29)–P(2)–C(6)–C(7)    | –66.7(2)   | C(5)–P(2)–C(6)–C(7)     | –171.8(2)  |
| Fe(1)–P(2)–C(6)–C(7)    | 68.2(2)    | P(2)–C(6)–C(7)–P(3)     | –87.8(2)   |
| C(41)–P(3)–C(7)–C(6)    | –78.9(2)   | C(35)–P(3)–C(7)–C(6)    | 176.5(2)   |
| Fe(2)–P(3)–C(7)–C(6)    | 47.9(2)    | C(9)–N(1)–C(8)–S(1)     | –70.0(3)   |
| C(10)–N(1)–C(8)–S(1)    | 165.9(2)   | Fe(1)–S(1)–C(8)–N(1)    | 68.5(2)    |
| Fe(2)–S(1)–C(8)–N(1)    | –6.8(2)    | C(8)–N(1)–C(9)–S(2)     | 70.4(3)    |
| C(10)–N(1)–C(9)–S(2)    | –166.8(2)  | Fe(1)–S(2)–C(9)–N(1)    | –70.3(2)   |
| Fe(2)–S(2)–C(9)–N(1)    | 5.5(2)     | C(8)–N(1)–C(10)–C(11)   | –175.1(2)  |
| C(9)–N(1)–C(10)–C(11)   | 61.3(3)    | N(1)–C(10)–C(11)–C(12)  | –127.3(3)  |
| N(1)–C(10)–C(11)–C(16)  | 53.0(4)    | C(16)–C(11)–C(12)–C(13) | 0.6(5)     |
| C(10)–C(11)–C(12)–C(13) | –179.1(3)  | C(11)–C(12)–C(13)–C(14) | 1.0(6)     |
| C(12)–C(13)–C(14)–C(15) | –1.6(6)    | C(13)–C(14)–C(15)–C(16) | 0.4(6)     |
| C(14)–C(15)–C(16)–C(11) | 1.3(6)     | C(12)–C(11)–C(16)–C(15) | –1.8(5)    |
| C(10)–C(11)–C(16)–C(15) | 177.9(3)   | C(23)–P(1)–C(17)–C(22)  | 118.6(2)   |
| C(4)–P(1)–C(17)–C(22)   | 13.3(3)    | Fe(1)–P(1)–C(17)–C(22)  | –104.0(2)  |
| C(23)–P(1)–C(17)–C(18)  | –65.6(2)   | C(4)–P(1)–C(17)–C(18)   | –170.9(2)  |
| Fe(1)–P(1)–C(17)–C(18)  | 71.9(2)    | C(22)–C(17)–C(18)–C(19) | –1.1(4)    |
| P(1)–C(17)–C(18)–C(19)  | –177.2(2)  | C(17)–C(18)–C(19)–C(20) | –0.4(5)    |
| C(18)–C(19)–C(20)–C(21) | 2.0(5)     | C(19)–C(20)–C(21)–C(22) | –2.0(5)    |
| C(18)–C(17)–C(22)–C(21) | 1.1(4)     | P(1)–C(17)–C(22)–C(21)  | 177.0(2)   |
| C(20)–C(21)–C(22)–C(17) | 0.4(5)     | C(17)–P(1)–C(23)–C(24)  | 82.3(3)    |
| C(4)–P(1)–C(23)–C(24)   | –171.6(2)  | Fe(1)–P(1)–C(23)–C(24)  | –45.5(3)   |
| C(17)–P(1)–C(23)–C(28)  | –97.0(3)   | C(4)–P(1)–C(23)–C(28)   | 9.1(3)     |
| Fe(1)–P(1)–C(23)–C(28)  | 135.2(2)   | C(28)–C(23)–C(24)–C(25) | 0.0(5)     |
| P(1)–C(23)–C(24)–C(25)  | –179.3(2)  | C(23)–C(24)–C(25)–C(26) | 0.1(5)     |
| C(24)–C(25)–C(26)–C(27) | –0.4(5)    | C(25)–C(26)–C(27)–C(28) | 0.4(6)     |
| C(26)–C(27)–C(28)–C(23) | –0.3(6)    | C(24)–C(23)–C(28)–C(27) | 0.0(5)     |
| P(1)–C(23)–C(28)–C(27)  | 179.4(3)   | C(6)–P(2)–C(29)–C(34)   | –40.2(3)   |
| C(5)–P(2)–C(29)–C(34)   | 64.2(3)    | Fe(1)–P(2)–C(29)–C(34)  | –172.7(2)  |
| C(6)–P(2)–C(29)–C(30)   | 143.7(2)   | C(5)–P(2)–C(29)–C(30)   | –112.0(2)  |
| Fe(1)–P(2)–C(29)–C(30)  | 11.1(3)    | C(34)–C(29)–C(30)–C(31) | –1.5(4)    |
| P(2)–C(29)–C(30)–C(31)  | 174.8(2)   | C(29)–C(30)–C(31)–C(32) | 1.4(5)     |
| C(30)–C(31)–C(32)–C(33) | 0.4(6)     | C(31)–C(32)–C(33)–C(34) | –2.1(5)    |
| C(32)–C(33)–C(34)–C(29) | 1.9(5)     | C(30)–C(29)–C(34)–C(33) | –0.2(4)    |
| P(2)–C(29)–C(34)–C(33)  | –176.4(2)  | C(41)–P(3)–C(35)–C(36)  | 150.5(3)   |
| C(7)–P(3)–C(35)–C(36)   | –103.4(3)  | Fe(2)–P(3)–C(35)–C(36)  | 22.6(3)    |
| C(41)–P(3)–C(35)–C(40)  | –33.0(3)   | C(7)–P(3)–C(35)–C(40)   | 73.1(3)    |
| Fe(2)–P(3)–C(35)–C(40)  | –160.9(2)  | C(40)–C(35)–C(36)–C(37) | –2.7(6)    |
| P(3)–C(35)–C(36)–C(37)  | 173.9(3)   | C(35)–C(36)–C(37)–C(38) | 2.2(7)     |

|                         |           |                         |           |
|-------------------------|-----------|-------------------------|-----------|
| C(36)–C(37)–C(38)–C(39) | 0.9(7)    | C(37)–C(38)–C(39)–C(40) | –3.5(6)   |
| C(38)–C(39)–C(40)–C(35) | 3.0(6)    | C(36)–C(35)–C(40)–C(39) | 0.1(6)    |
| P(3)–C(35)–C(40)–C(39)  | –176.6(3) | C(35)–P(3)–C(41)–C(42)  | 103.8(3)  |
| C(7)–P(3)–C(41)–C(42)   | 0.4(3)    | Fe(2)–P(3)–C(41)–C(42)  | –126.1(3) |
| C(35)–P(3)–C(41)–C(46)  | –77.7(3)  | C(7)–P(3)–C(41)–C(46)   | 178.9(2)  |
| Fe(2)–P(3)–C(41)–C(46)  | 52.4(3)   | C(46)–C(41)–C(42)–C(43) | –0.7(5)   |
| P(3)–C(41)–C(42)–C(43)  | 177.8(3)  | C(41)–C(42)–C(43)–C(44) | 0.8(6)    |
| C(42)–C(43)–C(44)–C(45) | –0.2(6)   | C(43)–C(44)–C(45)–C(46) | –0.5(6)   |
| C(44)–C(45)–C(46)–C(41) | 0.6(6)    | C(42)–C(41)–C(46)–C(45) | 0.0(5)    |
| P(3)–C(41)–C(46)–C(45)  | –178.6(3) |                         |           |

Symmetry operations for equivalent atoms

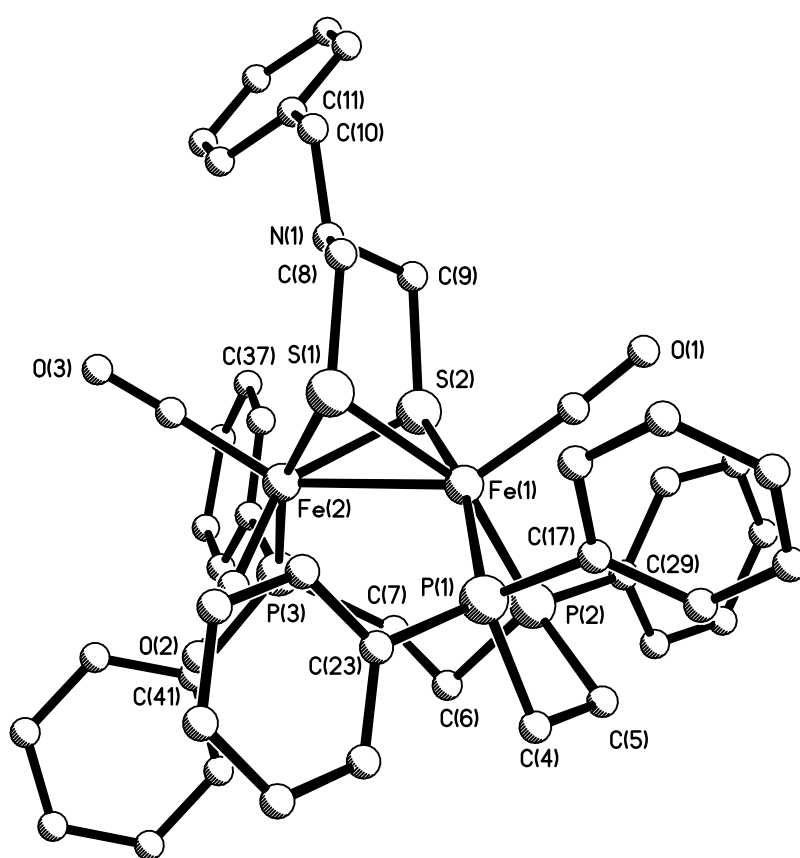



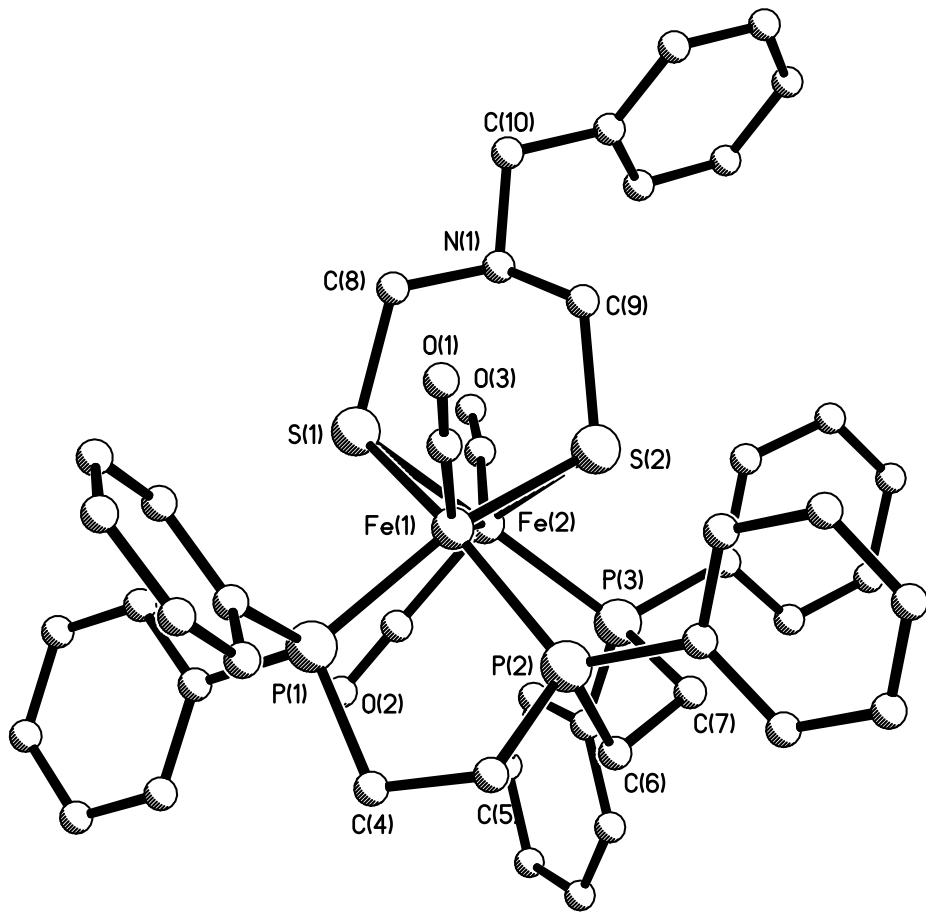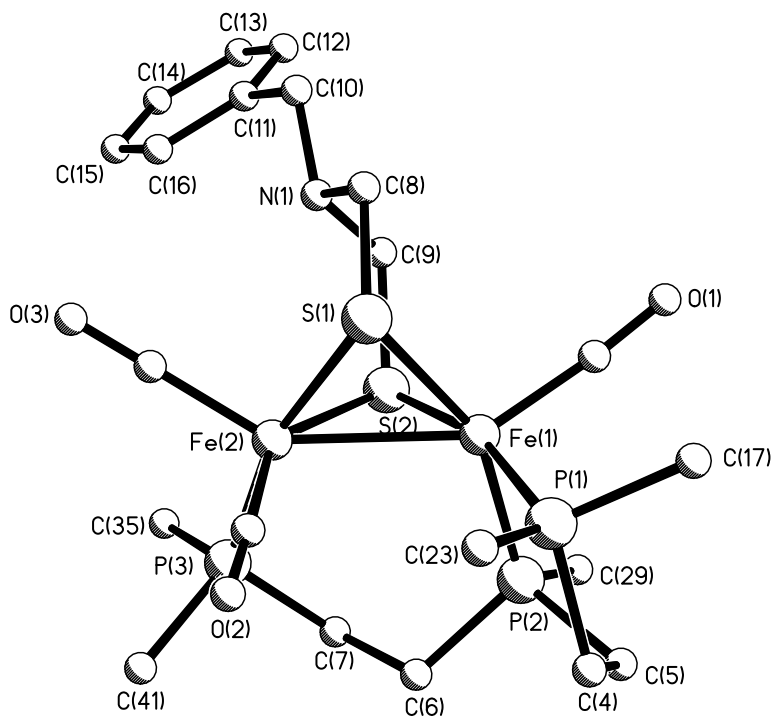

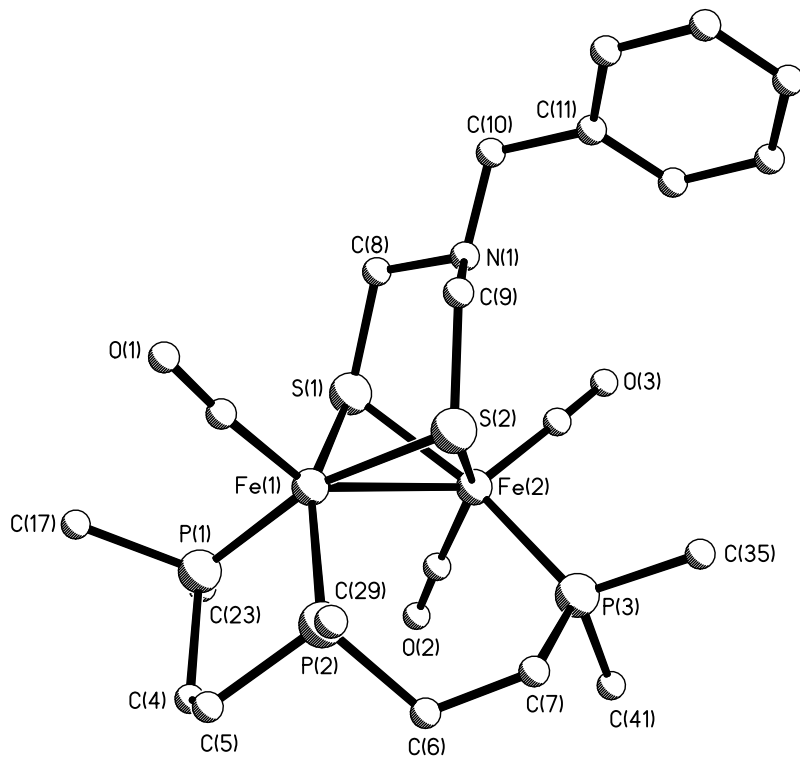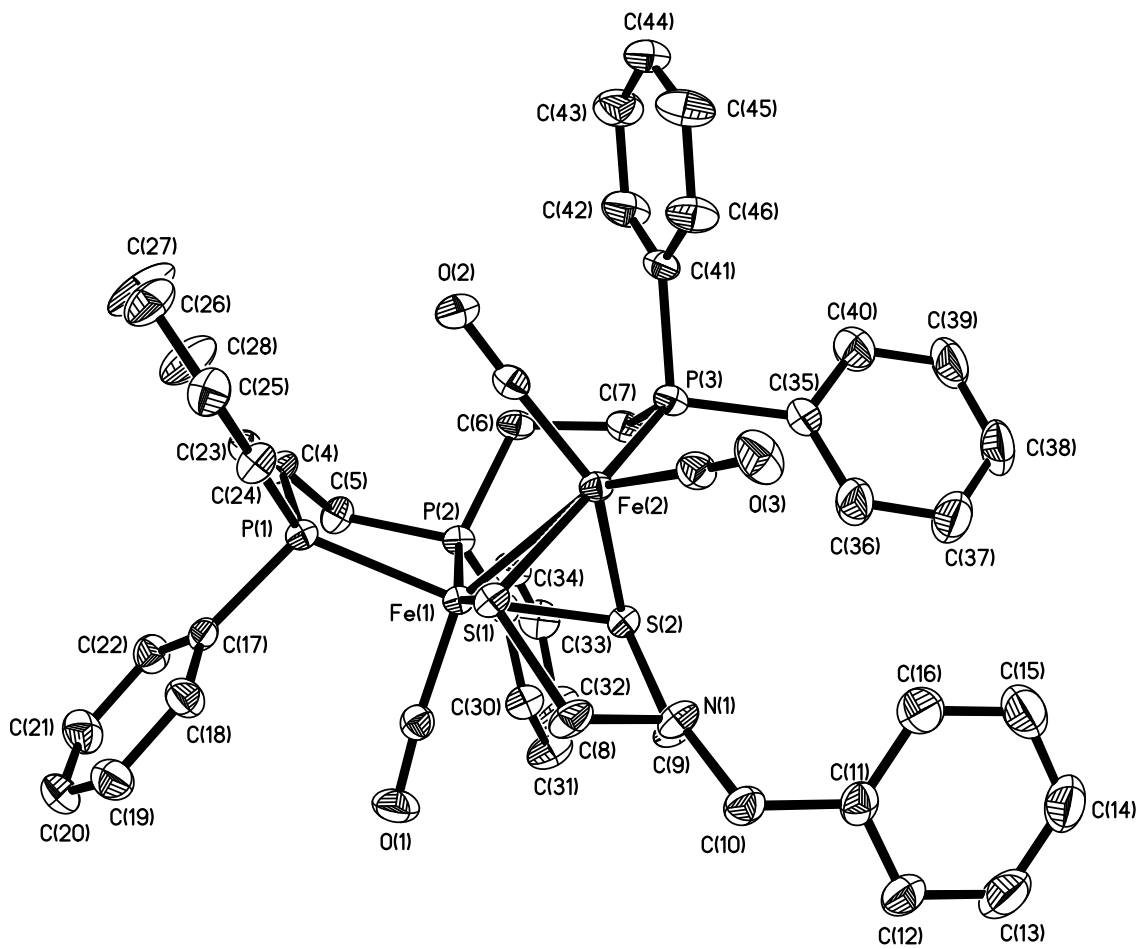

Supplement: c9dt00700h1.pdf [file c9dt00700h1.pdf]
